# Supplementary material for: Investigation of Intramolecular Through-Space Charge-Transfer States in Donor–Acceptor Charge-Transfer Systems
Source: PubMed Central journal article supplement (PMC8041366; doi:10.1021/acs.jpclett.1c00265), 2021-03-15
Supplement: jz1c00265_si_001.pdf [file jz1c00265_si_001.pdf]

## Supporting Information

# Investigation of Intramolecular Through-Space Charge-Transfer States in Donor-Acceptor Charge- Transfer Systems

*Shiv Kumar,<sup>a</sup> Larissa Gomes Franca,<sup>b</sup> Kleitos Stavrou,<sup>b</sup> Ettore Crovini,<sup>a</sup> David B. Cordes,<sup>a</sup>*

*Alexandra M. Z. Slawin,<sup>a</sup> Andrew P Monkman<sup>\*b</sup> and Eli Zysman-Colman<sup>\*a</sup>*

<sup>a</sup> Organic Semiconductor Centre, EaStCHEM School of Chemistry, University of St Andrews, St Andrews, Fife, UK, KY16 9ST, Fax: +44-1334 463808; Tel: +44-1334 463826; E-mail: [eli.zysman-colman@st-andrews.ac.uk](mailto:eli.zysman-colman@st-andrews.ac.uk); URL: <http://www.zysman-colman.com>

<sup>b</sup> Department of Physics, Durham University, Durham, UK, DH1 3LE; Tel: +44-191 33 43616; E-mail: [a.p.monkman@durham.ac.uk](mailto:a.p.monkman@durham.ac.uk)

## Table of Contents

|                                                                                                |            |
|------------------------------------------------------------------------------------------------|------------|
| <b>Experimental section .....</b>                                                              | <b>S3</b>  |
| <i>General synthetic procedures: .....</i>                                                     | <i>S3</i>  |
| <i>Theoretical calculations:.....</i>                                                          | <i>S3</i>  |
| <i>Electrochemical characterization:.....</i>                                                  | <i>S4</i>  |
| <i>Sample preparation.....</i>                                                                 | <i>S4</i>  |
| <i>Photophysical characterization.....</i>                                                     | <i>S4</i>  |
| <b>Synthesis .....</b>                                                                         | <b>S5</b>  |
| <i>5-Bromoacenaphthene (Br-ace).....</i>                                                       | <i>S5</i>  |
| <i>5,6-Dibromoacenaphthene (DBr-ace) .....</i>                                                 | <i>S5</i>  |
| <i>4-(1,2-dihydroacenaphthylene-5-yl)-N,N-diphenylaniline (TPA-ace) .....</i>                  | <i>S6</i>  |
| <i>4,4'-(1,2-dihydroacenaphthylene-5,6-diyl)bis(N,N-diphenylaniline) (2TPA-ace) .....</i>      | <i>S7</i>  |
| <i>4-(6-bromo-1,2-dihydroacenaphthylene-5-yl)-N,N-diphenylaniline (TPA-ace-Br).....</i>        | <i>S8</i>  |
| <i>6-(4-(diphenylamino)phenyl)-1,2-dihydroacenaphthylene-5-carbonitrile (TPA-ace-CN) .....</i> | <i>S8</i>  |
| <i>4,4'-(1,2-dihydroacenaphthylene-5,6-diyl)bis(N,N-diphenylaniline) (TPA-ace-TRZ).....</i>    | <i>S9</i>  |
| <b>Spectra .....</b>                                                                           | <b>S11</b> |
| <b>Single crystal X-ray diffraction analysis.....</b>                                          | <b>S32</b> |
| <b>Cartesian coordinates of the ground-state optimized geometries .....</b>                    | <b>S39</b> |
| <i>TPA-ace.....</i>                                                                            | <i>S39</i> |
| <i>2TPA-ace.....</i>                                                                           | <i>S40</i> |
| <i>TPA-ace-Br.....</i>                                                                         | <i>S41</i> |
| <i>TPA-ace-CN.....</i>                                                                         | <i>S43</i> |
| <i>TPA-ace-TRZ.....</i>                                                                        | <i>S44</i> |
| <b>Electrochemical properties .....</b>                                                        | <b>S46</b> |
| <b>Photophysical properties .....</b>                                                          | <b>S46</b> |
| <b>References.....</b>                                                                         | <b>S56</b> |

## Experimental section

*General synthetic procedures:* All commercially available chemicals and reagent grade solvents were used as received. Air-sensitive reactions were performed using standard Schlenk techniques under a nitrogen atmosphere. Dry toluene was obtained from a solvent purification system. Flash column chromatography was carried out using silica gel (60 Å, 40-63 µm). Analytical thin-layer-chromatography (TLC) was performed with silica plates with plastic backings. TLC visualization was accomplished by 254/365 nm UV lamp. <sup>1</sup>H, and <sup>13</sup>C NMR spectra were recorded on a Bruker Avance NMR spectrometer in CDCl<sub>3</sub>. Chemical shifts δ are expressed in parts per million (ppm) and referenced to chloroform (400 MHz for <sup>1</sup>H: δ = 7.26 ppm, and 101 MHz for <sup>13</sup>C: δ = 77.16 ppm). The signal structure is described as follows: s = singlet, d = doublet, m = multiplet, dd = doublet of doublets, dt = doublet of triplets, ddd = doublet of doublets of doublets. Melting points were measured using open-ended capillaries on an Electrothermal Mel-Temp® melting point apparatus and are uncorrected. High-resolution mass spectrometry (HRMS) was performed at the BSRC Mass Spectrometry Facility, University of St Andrews. Elemental analyses were performed by Mr. Stephen Boyer, London Metropolitan University. High performance liquid chromatography (HPLC) analysis was conducted on a Shimadzu Nexera prep HPLC system, using a Shimadzu Shim-pack GIST 3µm C18 analytical (3 X 150 mm) column.

*Theoretical calculations:* The DFT calculations, including geometry optimization of the emitters, were performed by the Gaussian 09 Revision D.01 software<sup>1</sup> in the gas phase using Density Functional Theory (DFT) level using PBE0 functional<sup>2</sup> and a 6-31G(d,p) basis set<sup>3</sup> starting with the molecular geometry obtained from single crystal X-ray diffraction analysis; that of **TPA-ace-Br** was optimized starting from an initial geometry drawn in GaussView v.5. Excited singlet and

triplet states were calculated by performing time dependent DFT (TD-DFT) calculations within the Tamm-Dancoff approximation<sup>4</sup> based on the same functional and basis set.

*Electrochemical characterization:* An electrochemical Analyzer potentiostat model 620E from CH Instruments was used for Cyclic Voltammetry (CV) analysis. All samples were prepared as dichloromethane (DCM) solutions, and bubbled with DCM saturated nitrogen gas for 15 minutes before measurements. 0.1 M DCM solution of tetra-*n*-butylammonium hexafluorophosphate was used as supporting electrolyte solution and Ag/Ag<sup>+</sup> electrode was used as the reference electrode while a platinum electrode and a platinum wire were used as the working electrode and counter electrode, respectively. The redox potentials are reported relative to a saturated calomel electrode (SCE) with a ferrocene/ferrocenium (Fc/Fc<sup>+</sup>) redox couple as the internal standard (0.40 V vs SCE in DCM).<sup>5</sup>

*Sample preparation:* Steady state measurements in solution were performed in three different solvents: MCH, toluene and DCM. All solutions were prepared at concentration of 20  $\mu$ M and degassed by five freeze–pump–thaw cycles. Solid state samples were fabricated by drop casting and spin coating method at 1% w/w of molecules in ZEONEX matrix (organic material 0.1mg/mL: ZEONEX 100 mg/mL – both dissolved in toluene). While drop-cast films were deposited onto quartz substrates, spin-coated films were deposited onto transparent sapphire substrates at 1200 rpm over a period of 60 seconds.

*Photophysical characterization:* Steady state measurements in solution were measured using a double beam Shimadzu UV-3600 UV/VIS/NIR spectrophotometer and a Horiba Jobin Yvon Fluorolog-3 spectrofluorometer. Time resolved measurements were detected by spectrograph and a gated iCCD camera (Stanford Computer Optics), where samples were excited with a Nd:YAG

laser (EKSPLA), 10 Hz, 355 nm. Photoluminescence quantum yields (PLQY) of spin coated films were measured using a calibrated integration sphere (Horiba Quanta- $\phi$ ) coupled to a Horiba Fluorolog-3 spectrofluorometer. The integration sphere was purged for 30 minutes with dry nitrogen gas. PLQY values were obtained by exciting at 320 nm.

## Synthesis

### 5-Bromoacenaphthene (*Br-ace*)

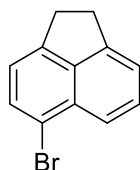

**Br-ace** was prepared according to the literature.<sup>6</sup> **Yield:** 90%. **Mp:** 54-56 °C (lit.<sup>6</sup> 50-52 °C). **<sup>1</sup>H-NMR (ppm)  $\delta$ :** 7.80 (dd,  $J = 8.4, 0.7$  Hz, 1H), 7.68 (d,  $J = 7.3$  Hz, 1H), 7.58 (dd,  $J = 8.3, 6.9$  Hz, 1H), 7.35 (d,  $J = 6.9$  Hz, 9H), 7.16 (dt,  $J = 7.3, 1.4$  Hz, 1H), 3.47 – 3.41 (m, 2H), 3.36 (ddd,  $J = 5.5, 4.5, 2.0$  Hz, 2H). **<sup>13</sup>C NMR (ppm)  $\delta$ :** 146.26, 145.97, 140.28, 130.89, 129.07, 121.76, 120.19, 120.07, 116.78, 30.65, 29.93. **HRMS (ESI) [M+H]<sup>+</sup> for (C<sub>12</sub>H<sub>9</sub>Br): Calculated:** 231.9888 [<sup>79</sup>Br], 233.9868 [<sup>81</sup>Br]; **Found:** 231.9885 [<sup>79</sup>Br], 233.9868 [<sup>81</sup>Br]. The <sup>1</sup>H NMR spectrum in CDCl<sub>3</sub> matches broadly with that previously reported in C<sub>6</sub>D<sub>6</sub>.<sup>6</sup>

### 5,6-Dibromoacenaphthene (*DBr-ace*)

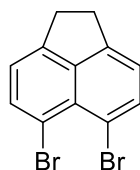

**DBr-ace** was prepared according to the literature.<sup>7</sup> **Yield:** 20-25%. **Mp:** 169-171 °C (lit.<sup>7</sup> 169-171 °C). **<sup>1</sup>H NMR (ppm)  $\delta$ :** 7.78 (d,  $J = 7.6$  Hz, 2H), 7.07 (d,  $J = 7.6$  Hz, 2H), 3.30 (s, 4H). **<sup>13</sup>C NMR (ppm)  $\delta$ :** 147.3, 142.16, 136.0, 128.0, 121.1, 114.6, 30.3. **HRMS (ESI) [M+H]<sup>+</sup> for (C<sub>12</sub>H<sub>8</sub>Br<sub>2</sub>)**

**Calculated:** 310.9066 [<sup>79</sup>Br, <sup>79</sup>Br], 312.9045 [<sup>79</sup>Br, <sup>81</sup>Br], 314.9025 [<sup>81</sup>Br, <sup>81</sup>Br]; **Found:** 310.9061 [<sup>79</sup>Br, <sup>79</sup>Br], 312.9038 [<sup>79</sup>Br, <sup>81</sup>Br], 314.9017 [<sup>81</sup>Br, <sup>81</sup>Br]. The compound characterization is in agreement with that previously reported.<sup>7</sup>

### General procedure for Suzuki-Miyaura cross-coupling reactions

A mixture of 4-(*N,N*-diphenylamino)phenyl boronic acid (1 equiv.), the bromo derivative of acenaphthene (1-2 equiv.), and Pd(PPh<sub>3</sub>)<sub>4</sub> (5 mol%) in toluene (10 mL) was heated to 90 °C and stirred for 30 min under a N<sub>2</sub> atmosphere. A de-aerated aqueous solution of K<sub>2</sub>CO<sub>3</sub> (2M, 0.1 mL) was injected into the reaction and the mixture was refluxed for 16 h. After cooling, the reaction mixture was diluted with ethyl acetate and filtered through Celite®. The filtrate was washed with brine, dried over anhydrous sodium sulfate and the solvent removed under reduced pressure. The residue was purified by flash column chromatography (silica gel, eluent: 5% EtOAc/hexane or 20% DCM/hexane).

#### 4-(1,2-dihydroacenaphthyl-5-yl)-*N,N*-diphenylaniline (*TPA-ace*)

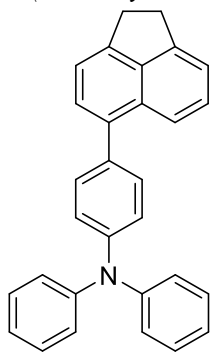

**TPA-ace:** Yellow solid. **R<sub>f</sub>:** 0.4 (5% EA/Hexanes). **Yield:** 0.10 g, 11%. **Mp:** 108-110 °C. **<sup>1</sup>H NMR (ppm) δ:** 7.82 (d, *J* = 8.2 Hz, 1H), 7.47 (ddd, *J* = 6.9, 4.0, 1.3 Hz, 4H), 7.38 – 7.26 (m, 8H), 7.24 – 7.19 (m, 6H), 7.19 – 7.12 (m, 2H), 7.11 – 7.00 (m, 3H), 3.59 – 3.34 (m, 4H). **<sup>13</sup>C NMR (ppm) δ:** 147.84, 146.78, 146.22, 145.28, 139.64, 135.26, 134.54, 130.49, 129.77, 129.28, 128.36,

127.90, 124.42, 123.62, 122.84, 120.96, 119.31, 119.17, 30.57, 30.01. **HRMS (ESI) [M+H]<sup>+</sup> for (C<sub>30</sub>H<sub>23</sub>N) Calculated:** 398.1909; **Found:** 398.1903. **Elemental analysis for (C<sub>30</sub>H<sub>23</sub>N) Calculated:** C, 90.64; H, 5.83; N, 3.52. **Found:** C, 90.60; H, 5.66; N, 3.67. **HPLC (RT):** 2.451 min (100% methanol).

*4,4'-(1,2-dihydroacenaphthylene-5,6-diyl)bis(N,N-diphenylaniline) (2TPA-ace)*

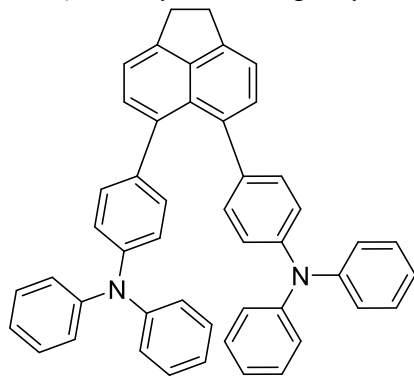

**2TPA-ace:** Orange solid. **R<sub>f</sub>:** 0.3 (20% DCM/Hexanes). **Yield:** 0.25 g, 24%. **Mp:** 242-244 °C. **<sup>1</sup>H NMR (ppm) δ:** 7.42 (dd, *J* = 17.1, 7.1 Hz, 4H), 7.26 – 7.18 (m, 16H), 7.06 – 6.99 (m, 4H), 6.92 – 6.80 (m, 4H), 3.51 (s, 4H). **<sup>13</sup>C NMR (ppm) δ:** 147.88, 145.73, 145.66, 140.73, 136.49, 136.04, 131.78, 130.47, 129.26, 127.50, 124.99, 122.76, 121.33, 119.24, 30.22. **HRMS (ESI) [M+H]<sup>+</sup> for (C<sub>48</sub>H<sub>36</sub>N<sub>2</sub>) Calculated:** 641.2957; **Found:** 641.2961. **Elemental Analysis for (C<sub>48</sub>H<sub>36</sub>N<sub>2</sub>) Calculated:** C, 89.97; H, 5.66; N, 4.37. **Found:** C, 90.19; H, 5.77; N, 4.48. **HPLC (RT):** 7.850 min (95% methanol).

4-(6-bromo-1,2-dihydroacenaphthylen-5-yl)-N,N-diphenylaniline (**TPA-ace-Br**)

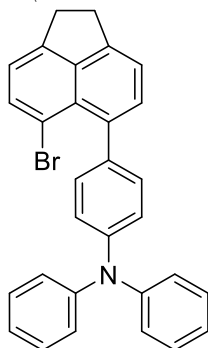

**TPA-ace-Br:** Bright yellow solid. **R<sub>f</sub>:** 0.6 (20% DCM/Hexanes). **Yield:** 0.2 g, 21%. **Mp:** 154-156 °C. **<sup>1</sup>H NMR (ppm) δ:** 7.72 (d, *J* = 7.3 Hz, 1H), 7.45 (d, *J* = 7.1 Hz, 1H), 7.38 – 7.27 (m, 5H), 7.27 – 7.18 (m, 6H), 7.18 – 7.11 (m, 3H), 7.08 – 7.01 (m, 2H), 3.49 – 3.44 (m, 2H), 3.43 – 3.38 (m, 2H). **<sup>13</sup>C NMR (ppm) δ:** 147.94, 146.69, 146.47, 146.20, 141.11, 136.11, 135.91, 134.38, 132.21, 131.50, 129.22, 128.40, 124.20, 122.93, 122.58, 120.33, 119.45, 114.90, 30.29, 30.03. **HRMS (ESI) [M+H]<sup>+</sup> for (C<sub>30</sub>H<sub>22</sub>BrN) Calculated:** 476.1008 [<sup>79</sup>Br], 478.0988 [<sup>81</sup>Br]. **Found:** 476.1003 [<sup>79</sup>Br], 478.0983 [<sup>81</sup>Br]. **Elemental analysis for (C<sub>30</sub>H<sub>22</sub>BrN) Calculated:** C, 75.63; H, 4.65; N, 2.94. **Found:** C, 75.87; H, 4.85; N, 2.88. **HPLC (RT):** 7.440 min (95% methanol).

6-(4-(diphenylamino)phenyl)-1,2-dihydroacenaphthylene-5-carbonitrile (**TPA-ace-CN**)

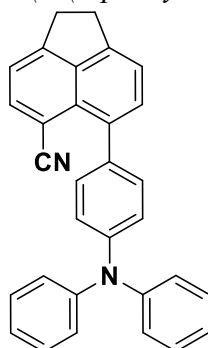



A mixture of **TPA-ace-Br** (0.9 g, 1.9 mmol, 1 equiv.) and CuCN (0.5 g, 5.6 mmol, 3 equiv.) in NMP (10 mL) was heated to 160 °C for 6 h. After cooling to room temperature, the reaction mixture was diluted with water and extracted with DCM (3 × 50 mL). The aqueous phase was treated with saturated NaOCl solution to destroy unreacted CuCN. The organic phase was washed with brine, dried over anhydrous sodium sulfate and the solvent was removed under reduced pressure. The crude product was purified by flash column chromatography with 30% DCM/hexane as eluent to afford the title compound as an orange solid. **R<sub>f</sub>**: 0.5 (30% DCM/hexanes). **Yield**: 0.65 g, 81%. **Mp**: 155-157 °C. **<sup>1</sup>H NMR (ppm) δ**: 7.89 (d, *J* = 7.2 Hz, 1H), 7.54 (d, *J* = 7.1 Hz, 1H), 7.46 (d, *J* = 7.1 Hz, 1H), 7.36 (d, *J* = 7.2 Hz, 1H), 7.34 – 7.15 (m, 14H), 7.03 (s, 2H), 3.51 (s, 4H). **<sup>13</sup>C NMR (ppm) δ**: 152.81, 146.16, 139.33, 137.95, 131.27, 129.20, 124.44, 123.43, 122.68, 120.53, 119.10, 118.61, 104.69, 31.00, 29.99. **HRMS (ESI) Calculated (m/z)**: 422.1783; **Found**: 422.1769. **Elemental analysis (calculated for C<sub>31</sub>H<sub>22</sub>N<sub>2</sub>)**: C, 88.12; H, 5.25; N, 6.63; **Found**: C, 88.00; H, 5.35; N, 6.52. **HPLC (RT)**: 1.584 min (100% methanol).

*4,4'-(1,2-dihydroacenaphthylene-5,6-diyl)bis(N,N-diphenylaniline) (TPA-ace-TRZ)*

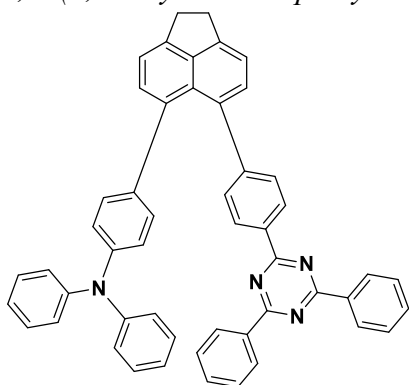

A reaction mixture of **TPA-ace-Br** (0.20 g, 1 equiv., 0.42 mmol) and Pd(PPh<sub>3</sub>)<sub>4</sub> (24 mg, 0.05 equiv., 21 μmol) in toluene (6 mL) was heated to 90 °C for 15 min under a N<sub>2</sub> atmosphere before

addition of 2,4-diphenyl-6-(4-(4,4,5,5-tetramethyl-1,3,2-dioxaborolan-2-yl)phenyl)-1,3,5-triazine (0.18 g, 1 equiv., 0.42 mmol). A solution of potassium carbonate (2 M, 4 mL) in water : ethanol (1:1) was deoxygenated by bubbling nitrogen gas for 15 min and added to the reaction mixture, which was then heated to 100 °C for 24 h. After cooling to room temperature, the reaction mixture was diluted with DCM (50 mL) and washed with brine (1 × 30 mL). The organic layer was dried over anhydrous sodium sulphate and the solvent was removed under reduced pressure. The crude product was purified by flash column chromatography with 20% DCM/hexanes to afford the title compound as an orange solid. **R<sub>f</sub>**: 0.5 (20% DCM/hexane). **Yield**: 0.1 g, 34%. **Mp**: 249-250 °C. **<sup>1</sup>H NMR (ppm) δ**: 8.87 – 8.79 (m, 4H), 8.60 – 8.54 (m, 2H), 7.71 – 7.58 (m, 6H), 7.52 – 7.42 (m, 4H), 7.34 – 7.26 (m, 4H), 7.01 – 6.90 (m, 6H), 6.85 – 6.78 (m, 4H), 6.78 – 6.70 (m, 2H), 6.69 – 6.60 (m, 2H), 3.55 (s, 4H). **<sup>13</sup>C NMR (ppm) δ**: 171.59, 147.62, 147.40, 146.76, 145.71, 140.78, 136.39, 135.94, 135.84, 135.57, 133.40, 132.47, 132.36, 132.07, 130.18, 130.09, 129.06, 128.99, 128.65, 127.84, 127.44, 124.69, 122.69, 121.23, 119.58, 119.25, 30.31, 30.23. **HRMS (ESI) [M+H]<sup>+</sup> calculated**: 705.3013; **Found**: 705.3006. **Elemental analysis (calculated for C<sub>51</sub>H<sub>36</sub>N<sub>4</sub>)**: C, 86.90; H, 5.15; N, 7.95; **Found**: C, 86.76; H, 5.06; N, 8.10. **HPLC (RT)**: 8.623 min (100% methanol).

## Spectra

10032018-15-ezc-sk240-M  
 1H Observe  
 sk-1168-240718-F

<sup>1</sup>H NMR (400 MHz, CDCl<sub>3</sub>) δ 7.80 (dd, *J* = 8.4, 0.7 Hz, 1H), 7.68 (d, *J* = 7.3 Hz, 1H), 7.58 (dd, *J* = 8.3, 6.9 Hz, 1H), 7.35 (d, *J* = 6.9 Hz, 9H), 7.16 (dt, *J* = 7.3, 1.4 Hz, 1H), 3.47–3.41 (m, 2H), 3.36 (ddd, *J* = 5.5, 4.5, 2.0 Hz, 2H).

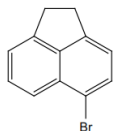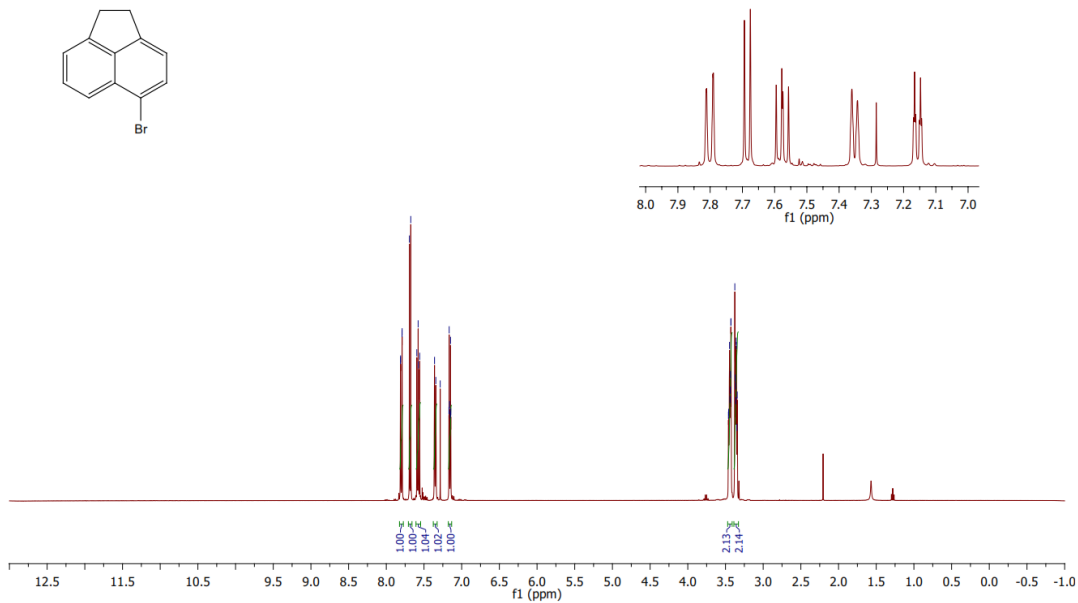

Figure S1. <sup>1</sup>H NMR spectra of Br-ace.

10032018-22-ezc-sk240-M  
 13C Observe with 1H decoupling - D1 = 2s  
 sk-1168-240718-F

<sup>13</sup>C NMR (101 MHz, CDCl<sub>3</sub>) δ 146.26, 145.97, 140.28, 130.89, 129.07, 121.76, 120.19, 120.07, 116.78, 30.65, 29.93.

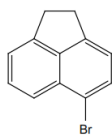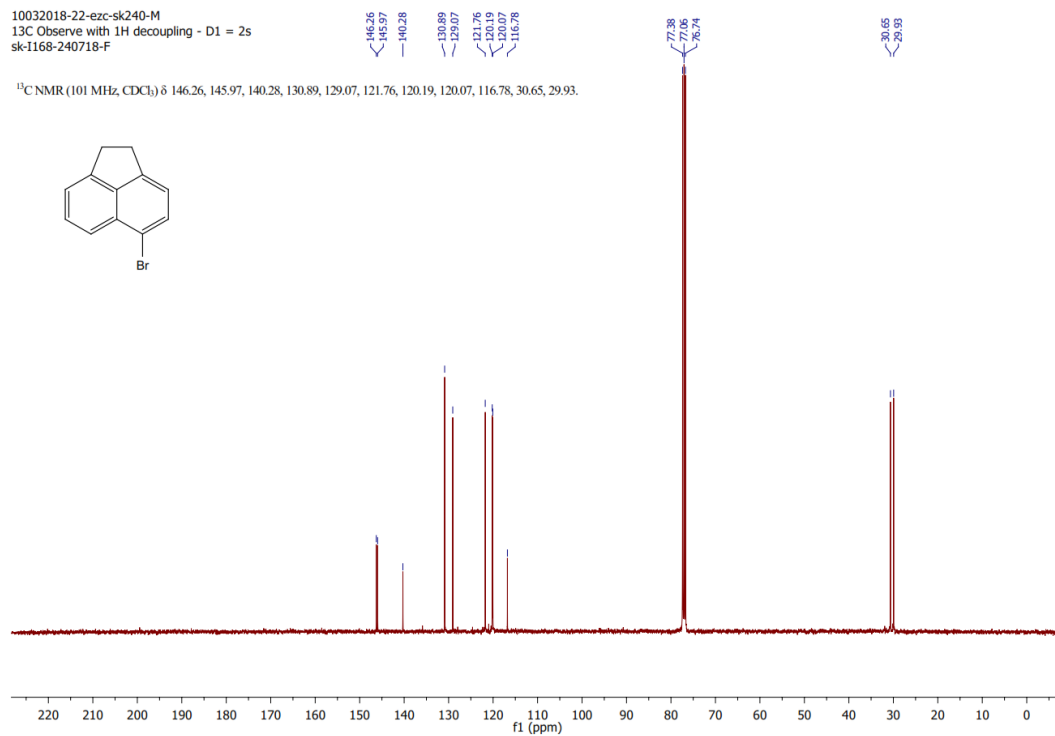

Figure S2. <sup>13</sup>C NMR spectra of Br-ace.

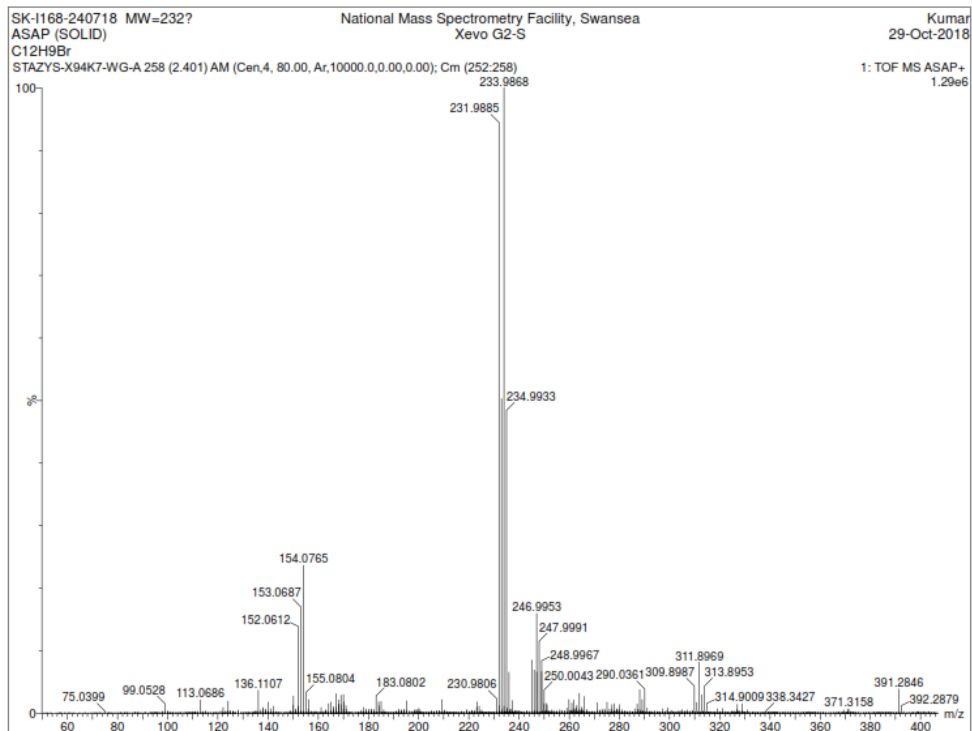

Figure S3. HRMS spectra of **Br-ace**.

12182018-11-ezc-sk240-N  
 1H Observe  
 sk-1142-110618-DBr-ace

$^1\text{H NMR}$  (400 MHz,  $\text{CDCl}_3$ )  $\delta$  7.81 (d,  $J = 7.4$  Hz, 2H), 7.11 (d,  $J = 7.4$  Hz, 2H), 3.33 (s, 4H).

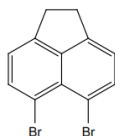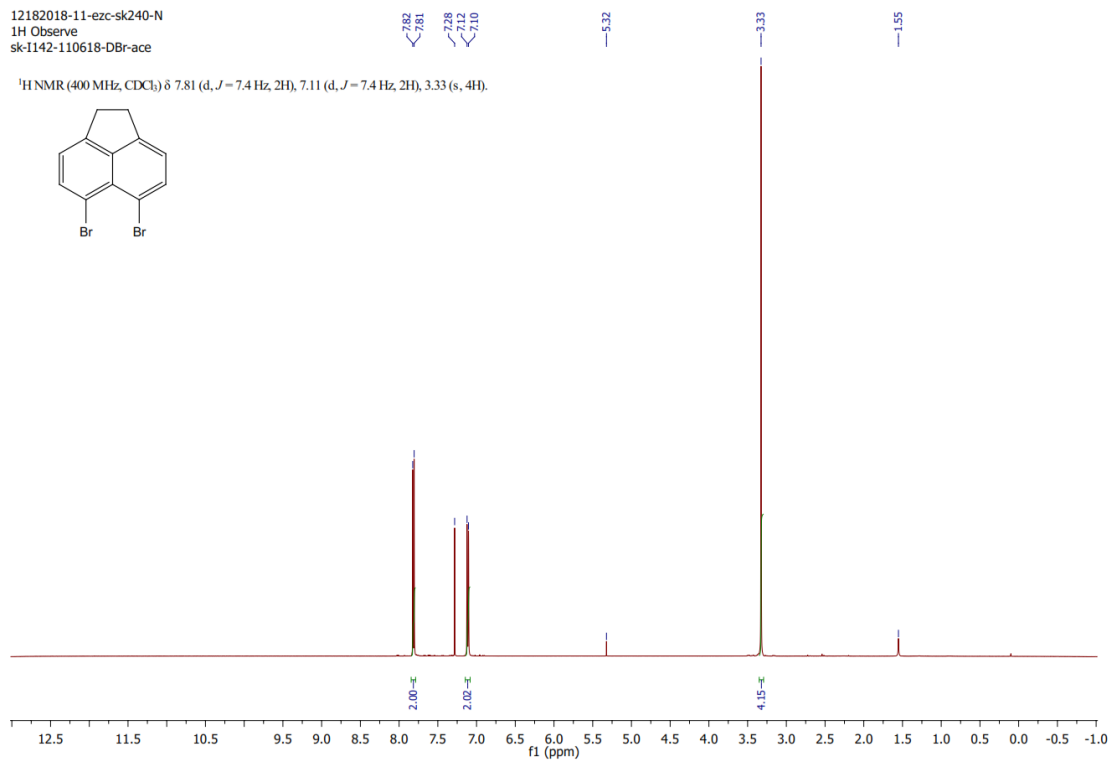

Figure S4.  $^1\text{H NMR}$  spectra of **DBr-ace**.

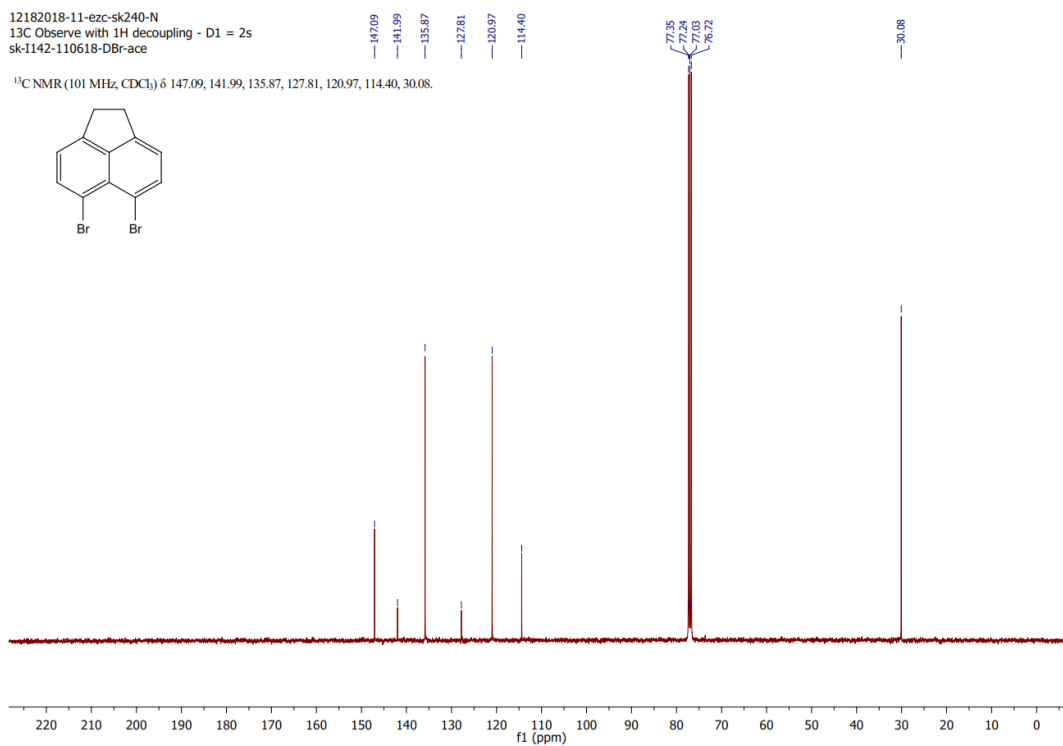

Figure S5. <sup>13</sup>C NMR spectra of **DBr-ace**.

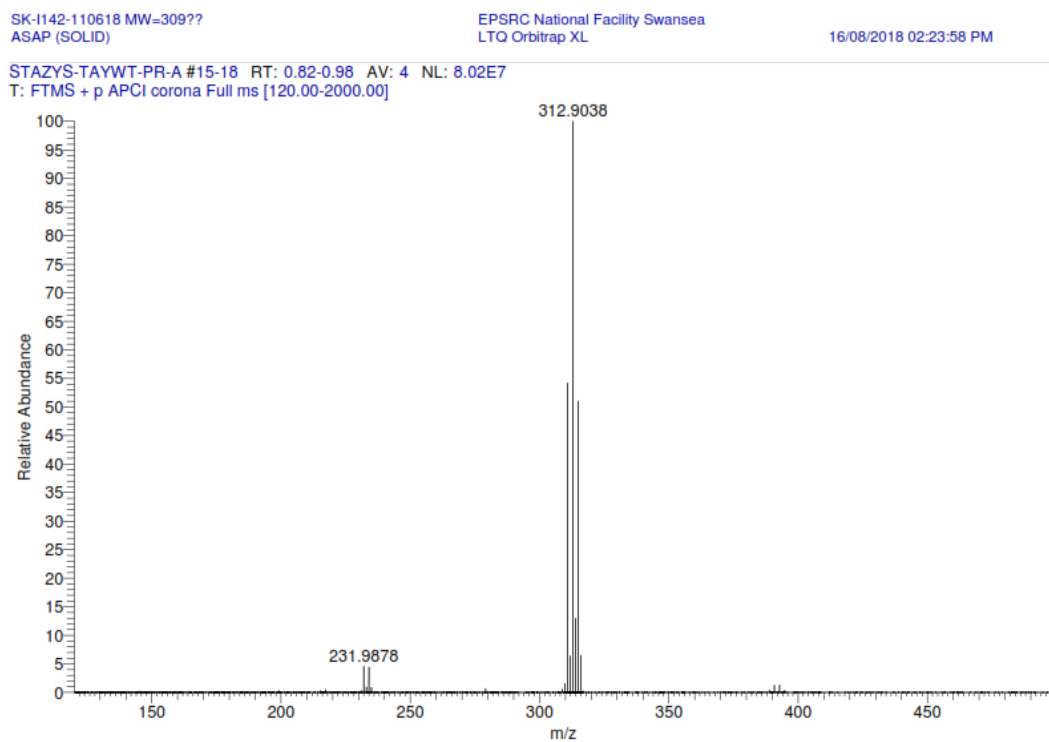

Figure S6. HRMS spectra of **DBr-ace**.

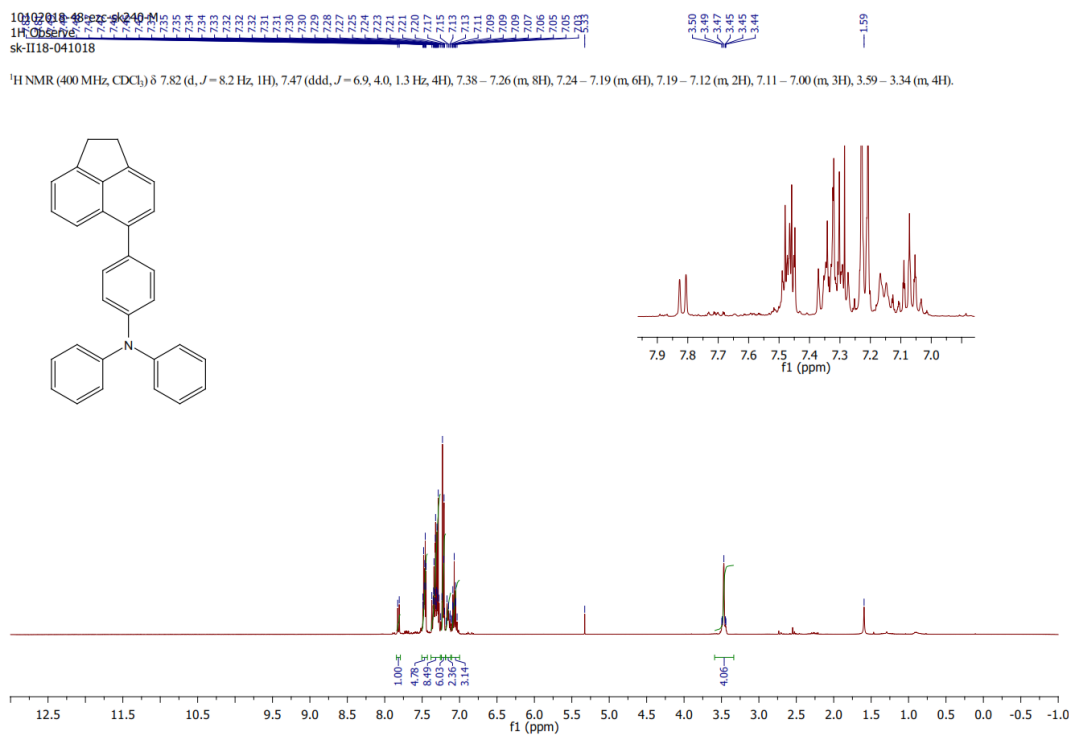

Figure S7. <sup>1</sup>H NMR spectra of TPA-ace.

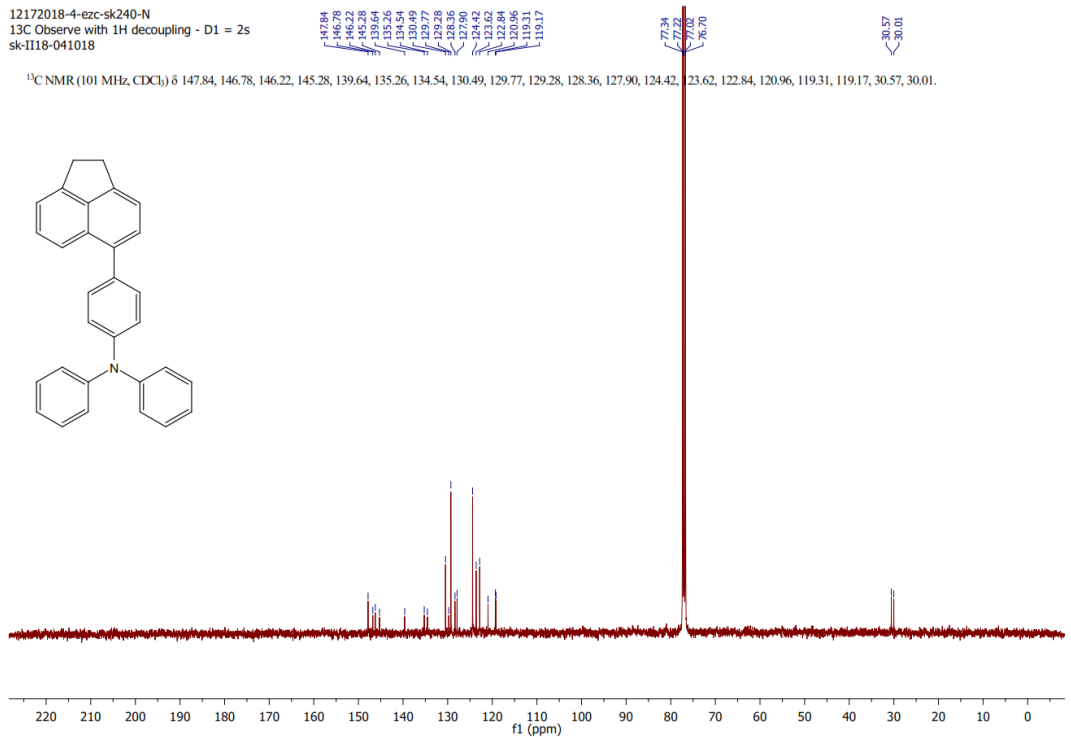

Figure S8. <sup>13</sup>C NMR spectra of TPA-ace.

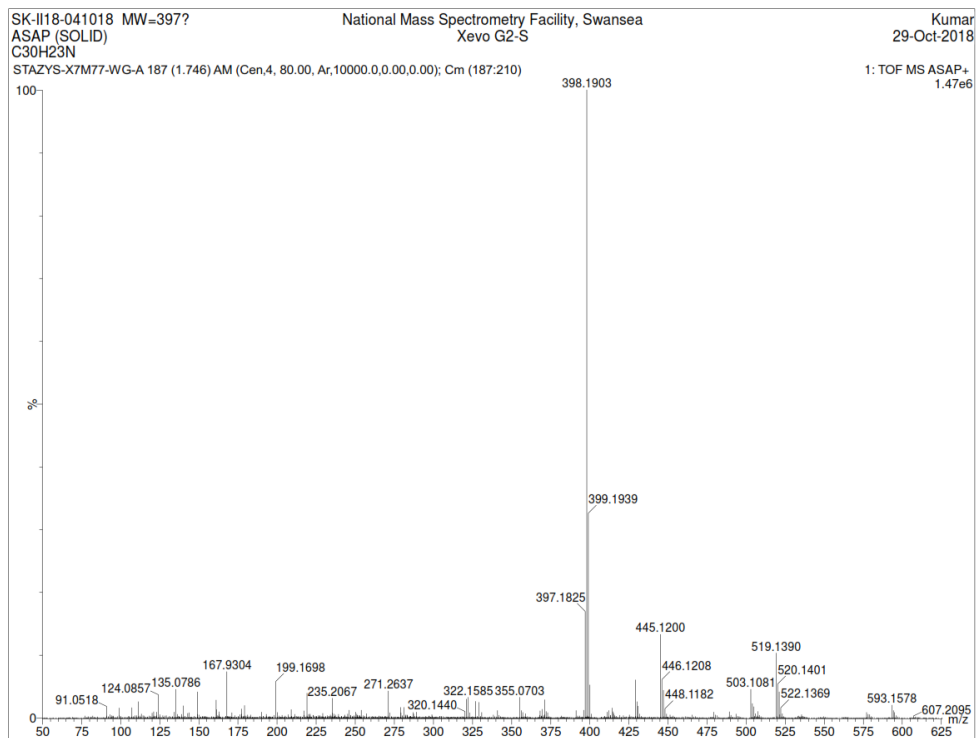

Figure S9. HRMS spectra of TPA-ace.

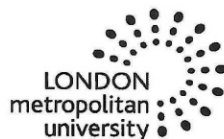

**Elemental Analysis Service**

Please send completed form and samples to:

Stephen Boyer  
School of Human Sciences  
Science Centre  
London Metropolitan University  
29 Hornsey Road  
London N7 7DD

Telephone: 020 7133 3605  
Fax: 020 7133 2577  
Email: [s.boyer@londonmet.ac.uk](mailto:s.boyer@londonmet.ac.uk)

|                      |                                                           |        |                        |
|----------------------|-----------------------------------------------------------|--------|------------------------|
| Sample submitted by: | Dr. Shiv Kumar                                            |        |                        |
| Address:             | E2C Group, School of Chemistry, University of St Andrews. |        |                        |
| Telephone:           | 01334 467243                                              | Email: | sk2uo@st-andrews.ac.uk |
| Date Submitted:      | 16-01-2019                                                |        |                        |

**Please submit ca. 5 mg of sample.**

|                       |                                   |
|-----------------------|-----------------------------------|
| Sample Reference No.: | SK-118-041018                     |
| Name of Compound:     | TPA-Ace                           |
| Molecular Formula:    | C <sub>30</sub> H <sub>23</sub> N |
| Stability:            | Stable at rt & pressure           |
| Hazards:              | Unknown                           |
| Other Remarks:        |                                   |

| Element  | Expected % | Found (1) | Found (2) |  |
|----------|------------|-----------|-----------|--|
| Carbon   | 90.64      | 90.65     | 90.60     |  |
| Hydrogen | 5.83       | 5.59      | 5.66      |  |
| Nitrogen | 3.52       | 3.65      | 3.67      |  |

Authorising Signature:

|                 |          |            |  |
|-----------------|----------|------------|--|
| Date Completed: | 23/01/19 | Signature: |  |
| Comments:       |          |            |  |

Figure S10. Elemental analysis report for TPA-ace.



# HPLC Trace Report25Nov2020

## <Sample Information>

Sample Name : TPA-ace  
 Sample ID : SK-II18-041018  
 Method Filename : 100% Methanol B 10 mins.lcm  
 Batch Filename : acenaphthene.lcb  
 Vial # : 1-21  
 Injection Volume : 10 uL  
 Date Acquired : 10/03/2020 18:49:43  
 Date Processed : 10/03/2020 19:09:53  
 Sample Type : Unknown  
 Acquired by : System Administrator  
 Processed by : System Administrator

## <Chromatogram>

mV

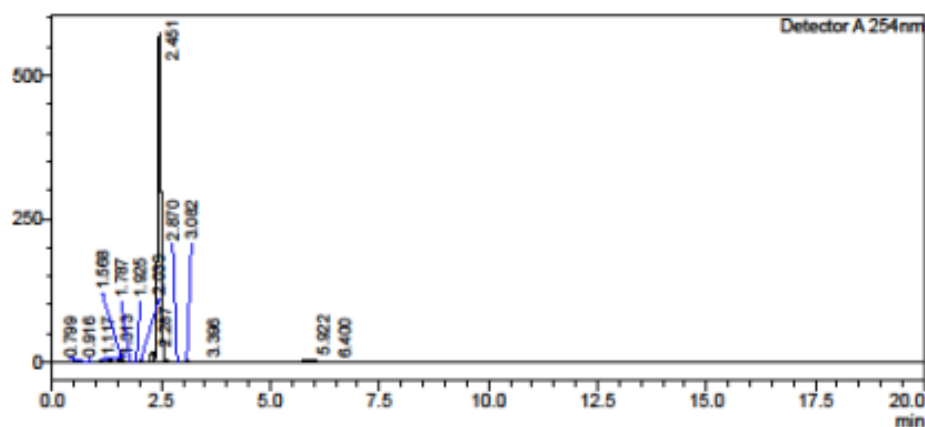

## <Peak Table>

Detector A 254nm

| Peak# | Ret. Time | Area    | Height | Area%   | Area/Height | Width at 5% Height |
|-------|-----------|---------|--------|---------|-------------|--------------------|
| 1     | 0.799     | 9751    | 1219   | 0.294   | 7.999       | --                 |
| 2     | 0.916     | 7245    | 1435   | 0.219   | 5.049       | --                 |
| 3     | 1.117     | 28850   | 2970   | 0.871   | 9.714       | --                 |
| 4     | 1.313     | 33759   | 5657   | 1.019   | 5.968       | --                 |
| 5     | 1.568     | 64157   | 13810  | 1.936   | 4.646       | 0.162              |
| 6     | 1.787     | 3811    | 544    | 0.115   | 7.005       | --                 |
| 7     | 1.925     | 3381    | 491    | 0.102   | 6.888       | --                 |
| 8     | 2.033     | 20407   | 4068   | 0.619   | 5.038       | --                 |
| 9     | 2.287     | 93233   | 19439  | 2.814   | 4.798       | --                 |
| 10    | 2.451     | 2949721 | 567292 | 89.032  | 5.200       | 0.169              |
| 11    | 2.870     | 2239    | 479    | 0.068   | 4.677       | 0.134              |
| 12    | 3.082     | 14049   | 2375   | 0.424   | 5.918       | 0.192              |
| 13    | 3.396     | 1572    | 266    | 0.047   | 5.916       | 0.186              |
| 14    | 5.922     | 79231   | 5010   | 2.391   | 15.815      | 0.537              |
| 15    | 6.400     | 1614    | 125    | 0.049   | 12.914      | --                 |
| Total |           | 3313109 | 625179 | 100.000 |             |                    |

Figure S11. HPLC analysis report for TPA-ace.

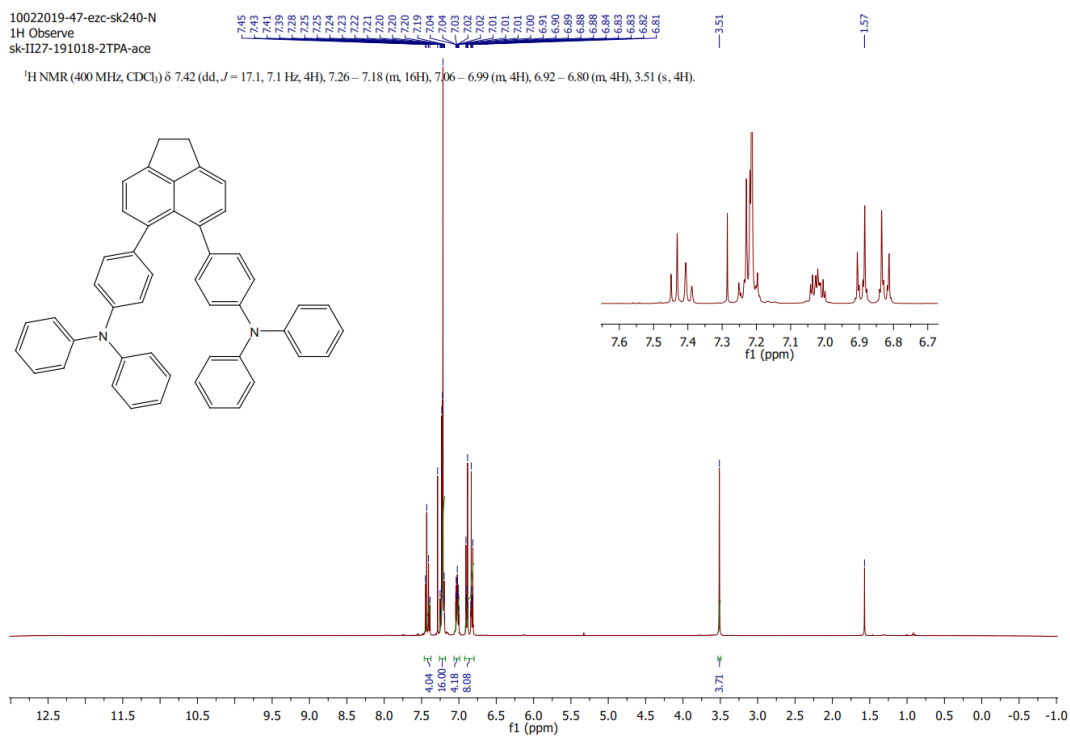

Figure S12. <sup>1</sup>H NMR spectra of 2TPA-ace.

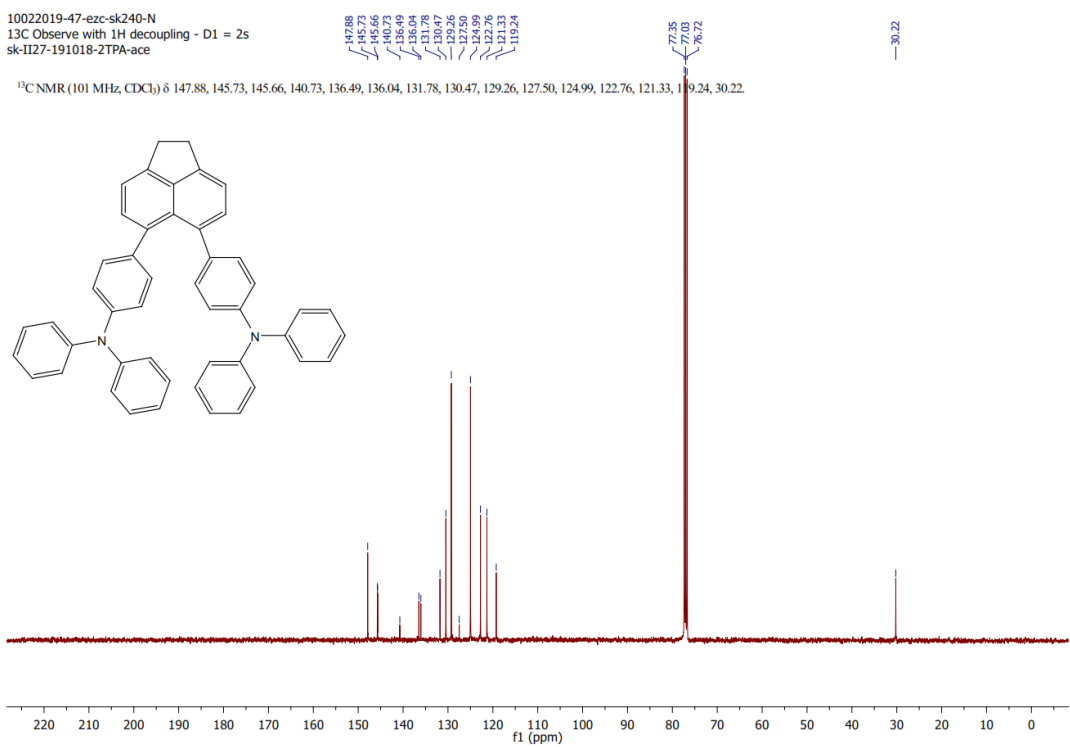

Figure S13. <sup>13</sup>C NMR spectra of 2TPA-ace.

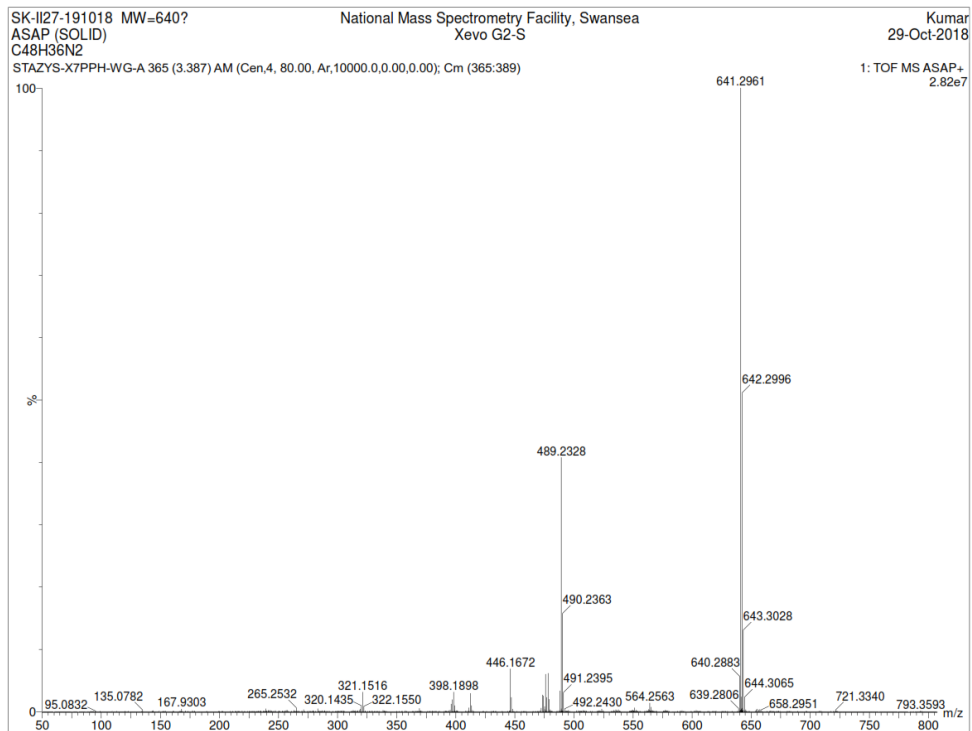

Figure S14. HRMS spectra of 2TPA-ace.

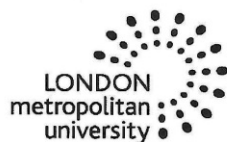

**Elemental Analysis Service**

Please send completed form and samples to:

Stephen Boyer  
School of Human Sciences  
Science Centre  
London Metropolitan University  
29 Hornsey Road  
London N7 7DD

Telephone: 020 7133 3605  
Fax: 020 7133 2577  
Email: [s.boyer@londonmet.ac.uk](mailto:s.boyer@londonmet.ac.uk)

|                      |                                                          |        |                        |
|----------------------|----------------------------------------------------------|--------|------------------------|
| Sample submitted by: | Dr Shiv Kumar                                            |        |                        |
| Address:             | E2C Group, School of Chemistry, University of St Andrews |        |                        |
| Telephone:           | 01334 467243                                             | Email: | SK240@st-andrews.ac.uk |
| Date Submitted:      | 16-01-2019                                               |        |                        |

Please submit ca. 5 mg of sample.

|                       |                           |
|-----------------------|---------------------------|
| Sample Reference No.: | SK-IJ27-131018            |
| Name of Compound:     | 2TPA-Ace                  |
| Molecular Formula:    | $C_{42}H_{36}N_2$         |
| Stability:            | Stable at rt and pressure |
| Hazards:              | N/A (Unknown)             |
| Other Remarks:        |                           |

| Element  | Expected % | Found (1) | Found (2) |
|----------|------------|-----------|-----------|
| Carbon   | 89.97      | 90.19     | 90.11     |
| Hydrogen | 5.66       | 5.77      | 5.78      |
| Nitrogen | 4.37       | 4.48      | 4.45      |

Authorising Signature:

|                 |          |            |           |
|-----------------|----------|------------|-----------|
| Date Completed: | 22/01/19 | Signature: | <i>SK</i> |
| Comments:       |          |            |           |

Figure S15. Elemental analysis report for 2TPA-ace.

# HPLC Trace Report25Nov2020

## <Sample Information>

Sample Name : 2TPA-ace  
 Sample ID : SK-II27-191018  
 Method Filename : 95% Methanol 5 Water 20 mins.lcm  
 Batch Filename : acenaphthene\_5.lcb  
 Vial # : 1-38  
 Injection Volume : 10 uL  
 Date Acquired : 13/03/2020 18:35:58  
 Date Processed : 13/03/2020 19:01:08

Sample Type : Unknown  
 Acquired by : System Administrator  
 Processed by : System Administrator

## <Chromatogram>

mV

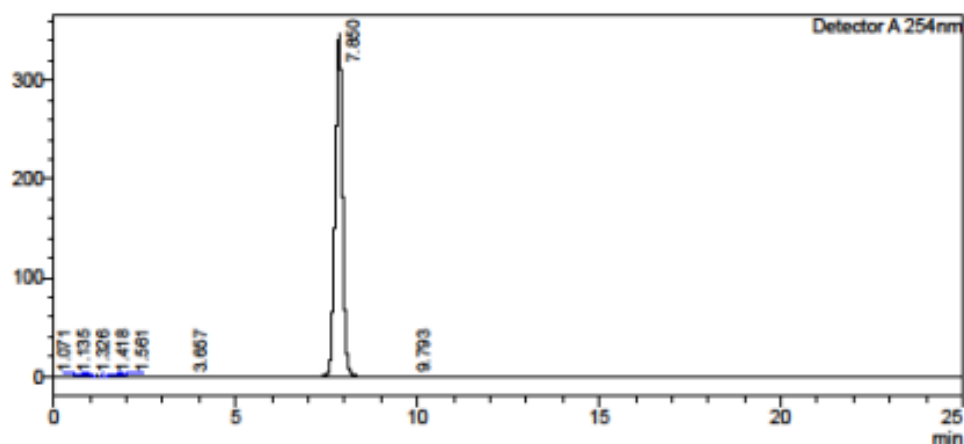

## <Peak Table>

Detector A 254nm

| Peak# | Ret. Time | Area    | Height | Area%   | Area/Height | Width at 5% Height |
|-------|-----------|---------|--------|---------|-------------|--------------------|
| 1     | 1.071     | 5914    | 924    | 0.119   | 6.401       | --                 |
| 2     | 1.135     | 7708    | 1064   | 0.155   | 7.247       | --                 |
| 3     | 1.326     | 4374    | 816    | 0.088   | 5.363       | --                 |
| 4     | 1.418     | 3308    | 636    | 0.066   | 5.201       | --                 |
| 5     | 1.561     | 11264   | 1356   | 0.226   | 8.306       | --                 |
| 6     | 3.667     | 1407    | 151    | 0.028   | 9.327       | 0.288              |
| 7     | 7.850     | 4936833 | 345409 | 99.232  | 14.292      | 0.477              |
| 8     | 9.793     | 4255    | 221    | 0.086   | 19.261      | 0.553              |
| Total |           | 4974863 | 350576 | 100.000 |             |                    |

Figure S16. HPLC analysis of 2TPA-ace.

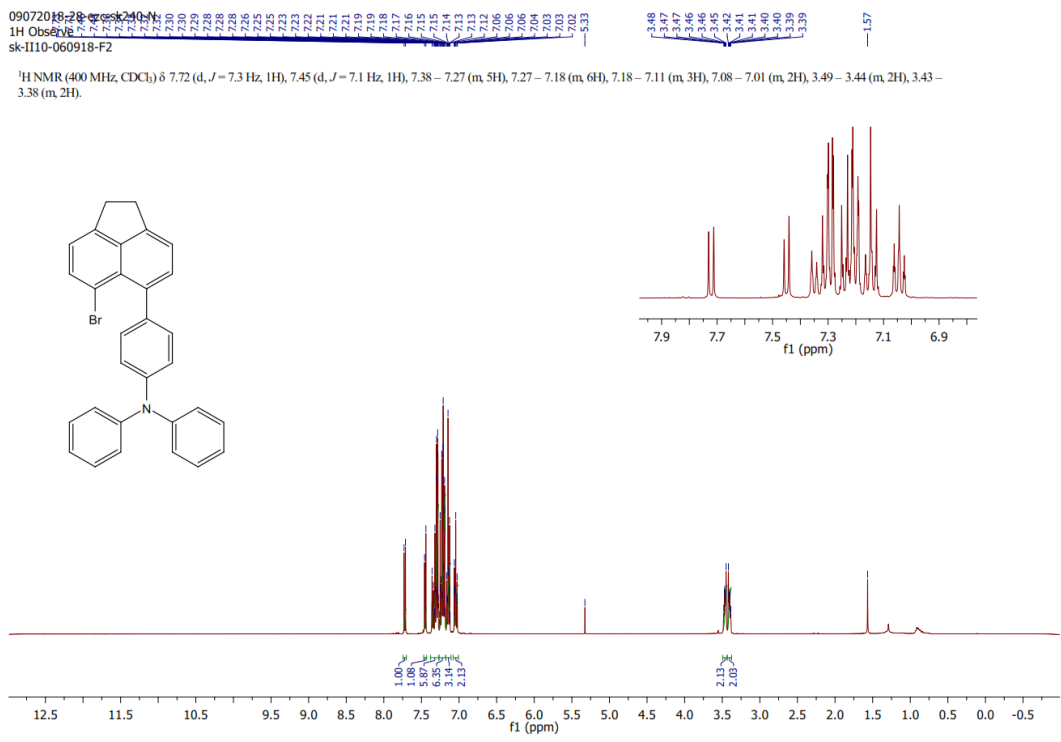

Figure S17. <sup>1</sup>H NMR spectra of TPA-ace-Br.

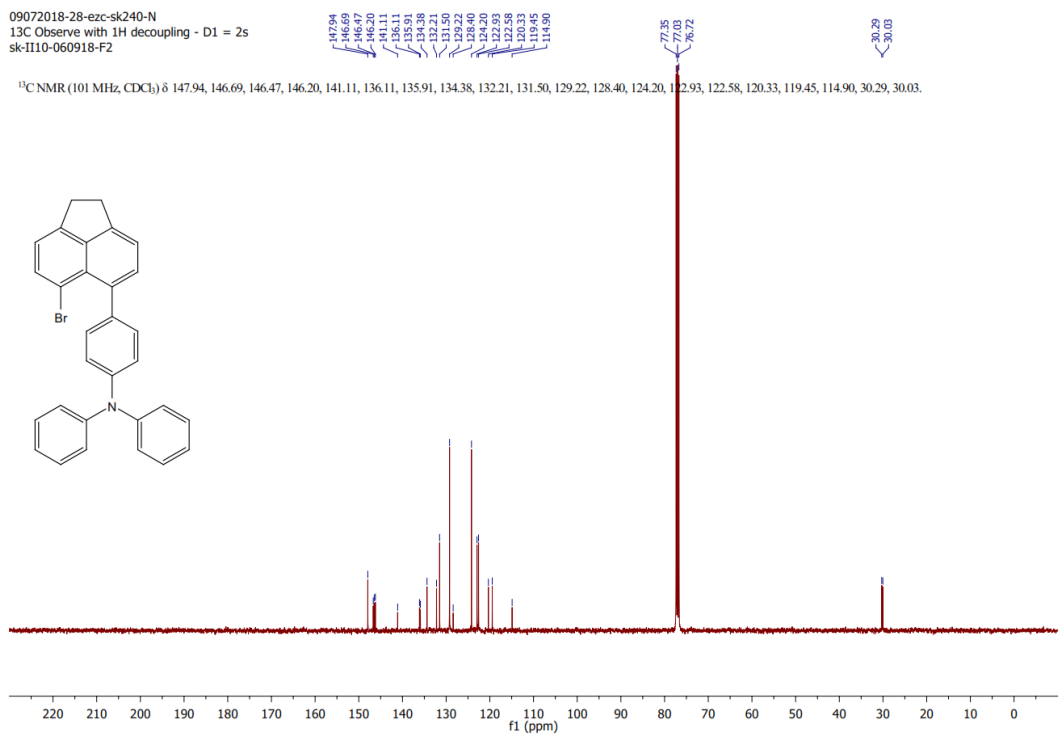

Figure S18. <sup>13</sup>C NMR spectra of TPA-ace-Br.

STAZYS\_TE333\_48739 #39-50 RT: 0.73-1.03 AV: 10 SM: 7G NL: 2.61E5  
T: FTMS + p NSI Full ms [120.00-1935.00]

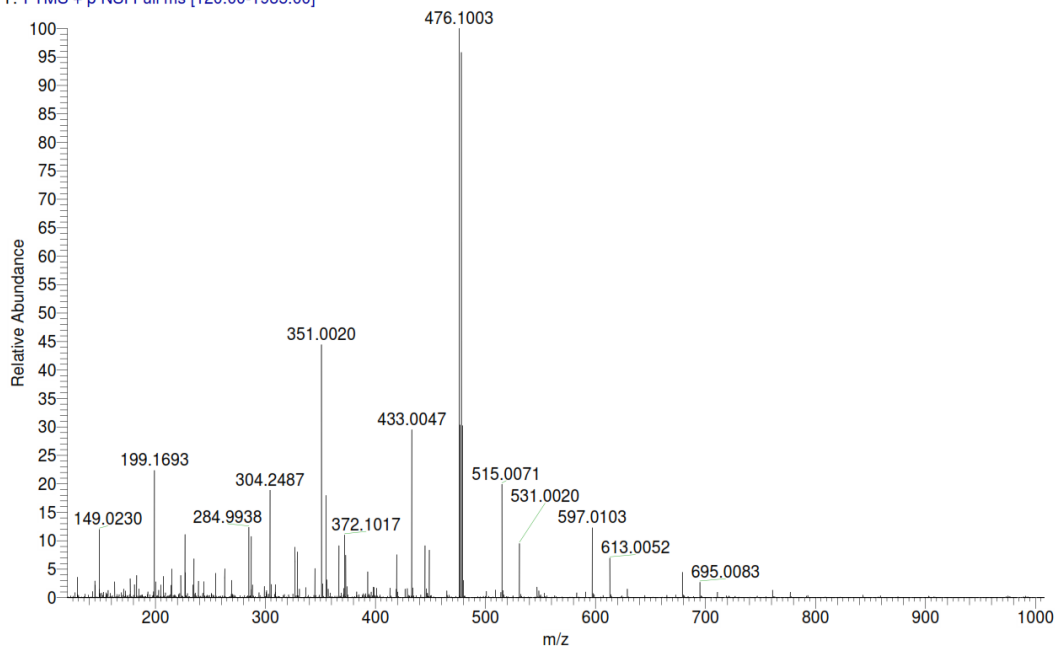

Figure S19. HRMS spectra of TPA-ace-Br.

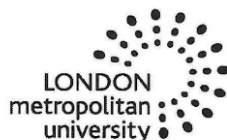

**Elemental Analysis Service**

Please send completed form and samples to:

Stephen Boyer  
 School of Human Sciences  
 Science Centre  
 London Metropolitan University  
 29 Hornsey Road  
 London N7 7DD

Telephone: 020 7133 3605  
 Fax: 020 7133 2577  
 Email: [s.boyer@londonmet.ac.uk](mailto:s.boyer@londonmet.ac.uk)

|                                                                     |
|---------------------------------------------------------------------|
| Sample submitted by: <i>Dr. Shiv Kumar</i>                          |
| Address: <i>E2C Group, School of Chemistry, Univ. of St Andrews</i> |
| Telephone: <i>01334 467243</i> Email: <i>SK240@st-andrews.ac.uk</i> |
| Date Submitted: <i>11-09-2018</i>                                   |

Please submit ca. 5 mg of sample.

|                                                                                   |
|-----------------------------------------------------------------------------------|
| Sample Reference No.: <i>SK-II 10 - 060918</i>                                    |
| Name of Compound: <i>4-bromo-1,2-dihydroacenaphthylen-5-yl)-N,N-diphenylamine</i> |
| Molecular Formula: <i>C<sub>30</sub>H<sub>22</sub>BrN</i>                         |
| Stability: <i>Stable at r.t. &amp; pressure</i>                                   |
| Hazards: <i>None</i>                                                              |
| Other Remarks:                                                                    |

| Element  | Expected %   | Found (1)    | Found (2)    |
|----------|--------------|--------------|--------------|
| Carbon   | <i>75.63</i> | <i>75.44</i> | <i>75.52</i> |
| Hydrogen | <i>4.65</i>  | <i>4.66</i>  | <i>4.68</i>  |
| Nitrogen | <i>2.94</i>  | <i>3.05</i>  | <i>3.08</i>  |

Authorising Signature:

|                               |                               |
|-------------------------------|-------------------------------|
| Date Completed: <i>170918</i> | Signature: <i>[Signature]</i> |
| Comments:                     |                               |

Figure S20. Elemental analysis for TPA-ace-Br.



# HPLC Trace Report 24 Nov 2020

## <Sample Information>

Sample Name : TPA-ace-Br  
 Sample ID :  
 Method Filename : 87% Acetonitrile 13 Water 20 mins.lcm  
 Batch Filename : Shiv\_TPA-ace\_series-MeCN-87\_TPA-ace-Br-97\_TPA-ace-TRZ.lcb  
 Vial # : 2-47 Sample Type : Unknown  
 Injection Volume : 2 uL  
 Date Acquired : 20/11/2020 09:02:25 Acquired by : System Administrator  
 Date Processed : 20/11/2020 09:22:28 Processed by : System Administrator

## <Chromatogram>

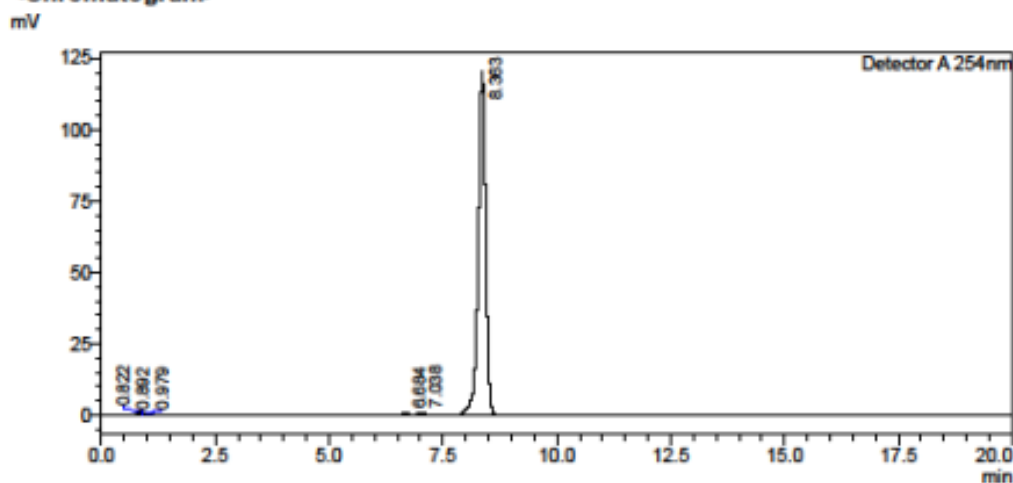

## <Peak Table>

| Peak# | Ret. Time | Area    | Height | Area%   | Area/Height | Width at 5% Height |
|-------|-----------|---------|--------|---------|-------------|--------------------|
| 1     | 0.822     | 4698    | 1448   | 0.332   | 3.245       | --                 |
| 2     | 0.892     | 1051    | 397    | 0.074   | 2.646       | --                 |
| 3     | 0.979     | 2742    | 569    | 0.194   | 4.823       | --                 |
| 4     | 6.684     | 5863    | 665    | 0.414   | 8.816       | --                 |
| 5     | 7.038     | 9859    | 1059   | 0.696   | 9.307       | 0.309              |
| 6     | 8.363     | 1391954 | 120124 | 98.290  | 11.588      | 0.411              |
| Total |           | 1416167 | 124262 | 100.000 |             |                    |

Figure S21. HPLC analysis report for TPA-ace-Br.

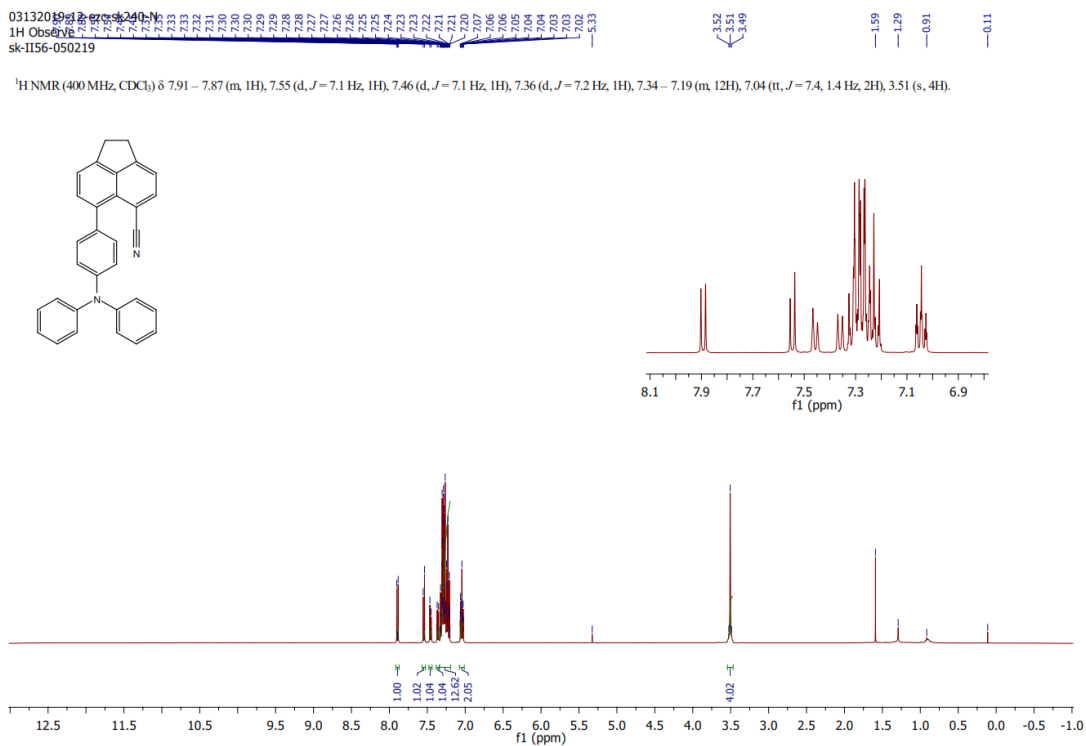

Figure S22. <sup>1</sup>H NMR spectra of TPA-ace-CN.

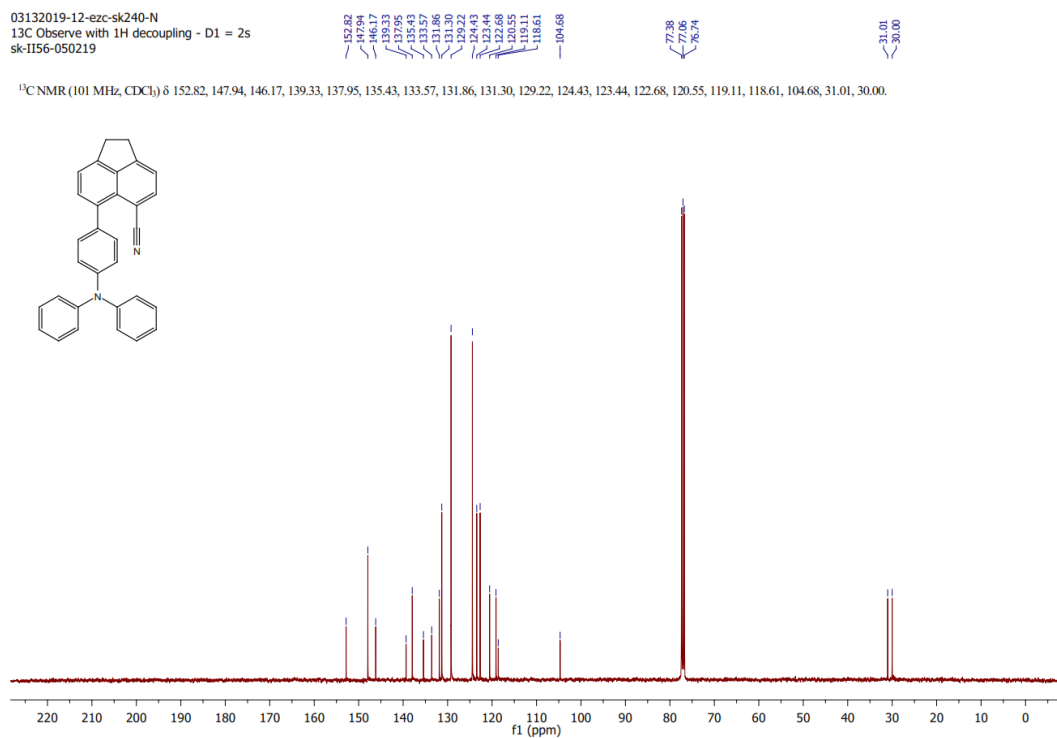

Figure S23. <sup>13</sup>C NMR spectra of TPA-ace-CN.

SK\_1156\_050219 #1-137 RT: 0.01-1.01 AV: 137 NL: 4.20E7  
T: FTMS + p ESI Full ms [75.00-1000.00]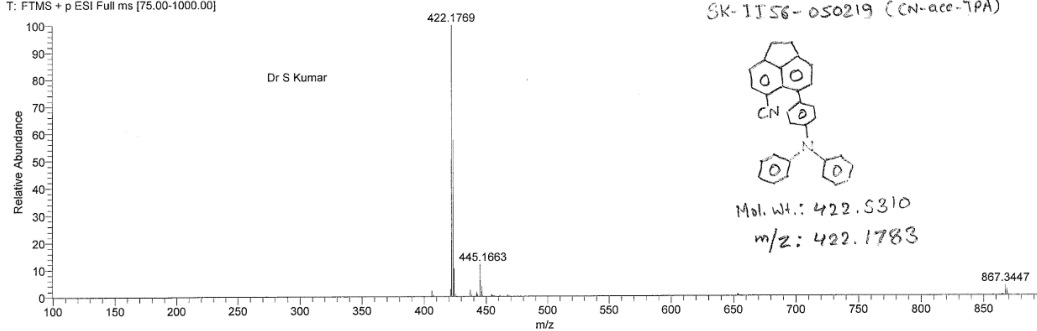SK\_1156\_050219 #1-137 RT: 0.01-1.01 AV: 137 NL: 4.20E7  
T: FTMS + p ESI Full ms [75.00-1000.00]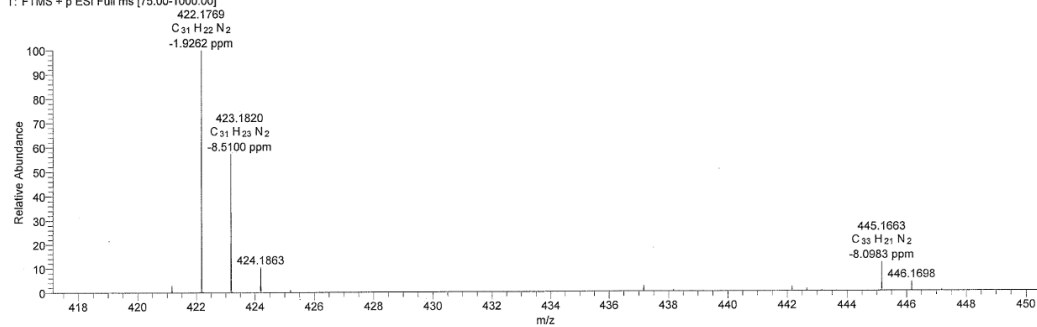

Figure S24. HRMS of TPA-ace-CN.

# HPLC Trace Report 24 Nov 2020

## <Sample Information>

Sample Name : TPA-ace-CN  
 Sample ID :  
 Method Filename : 80% Acetonitrile 20 Water 20 mins.lcm  
 Batch Filename : Shiv\_TPA-ace\_series-MeCN-80.lcb  
 Vial # : 2-48  
 Injection Volume : 2 uL  
 Date Acquired : 18/11/2020 13:08:55  
 Date Processed : 18/11/2020 13:28:58

Sample Type : Unknown  
 Acquired by : System Administrator  
 Processed by : System Administrator

## <Chromatogram>

mV

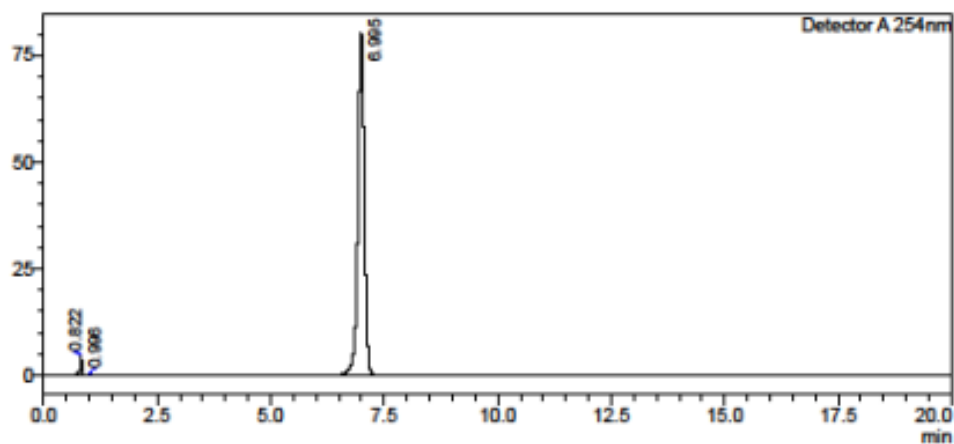

## <Peak Table>

Detector A 254nm

| Peak# | Ret. Time | Area   | Height | Area%   | Area/Height | Width at 5% Height |
|-------|-----------|--------|--------|---------|-------------|--------------------|
| 1     | 0.822     | 13728  | 4638   | 1.691   | 2.961       | 0.124              |
| 2     | 0.996     | 1529   | 521    | 0.188   | 2.936       | --                 |
| 3     | 6.995     | 796578 | 79994  | 98.121  | 9.958       | 0.348              |
| Total |           | 811833 | 85151  | 100.000 |             |                    |

Figure S25. HPLC analysis report for TPA-ace-CN.

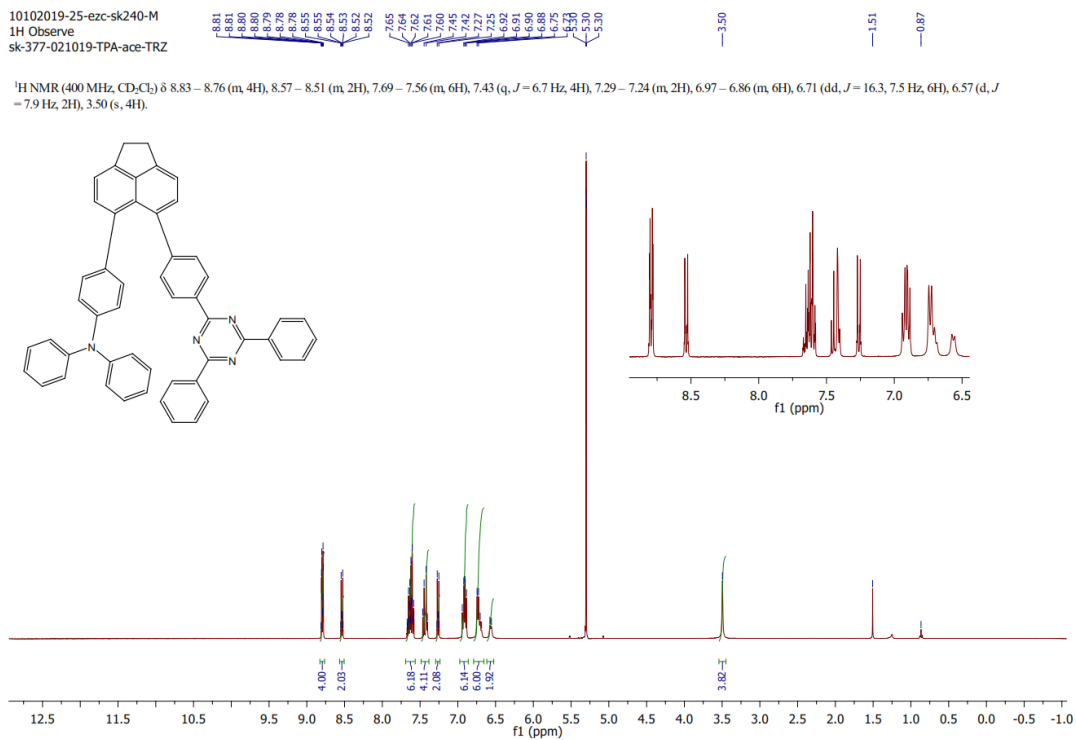

Figure S26.  $^1\text{H NMR}$  spectra of TPA-ace-TRZ.

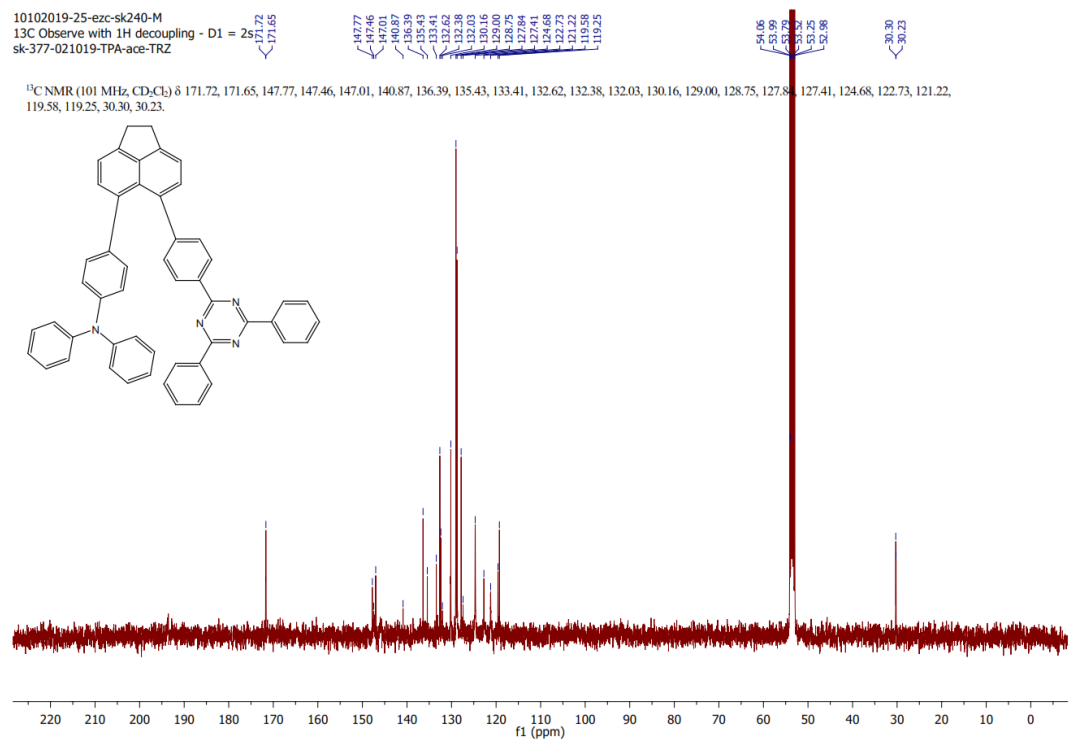

Figure S27.  $^{13}\text{C NMR}$  spectra of TPA-ace-TRZ.

SK\_377 #1-136 RT: 0.01-1.01 AV: 136 NL: 2.58E7  
T: FTMS + p ESI Full ms [80.00-1000.00]

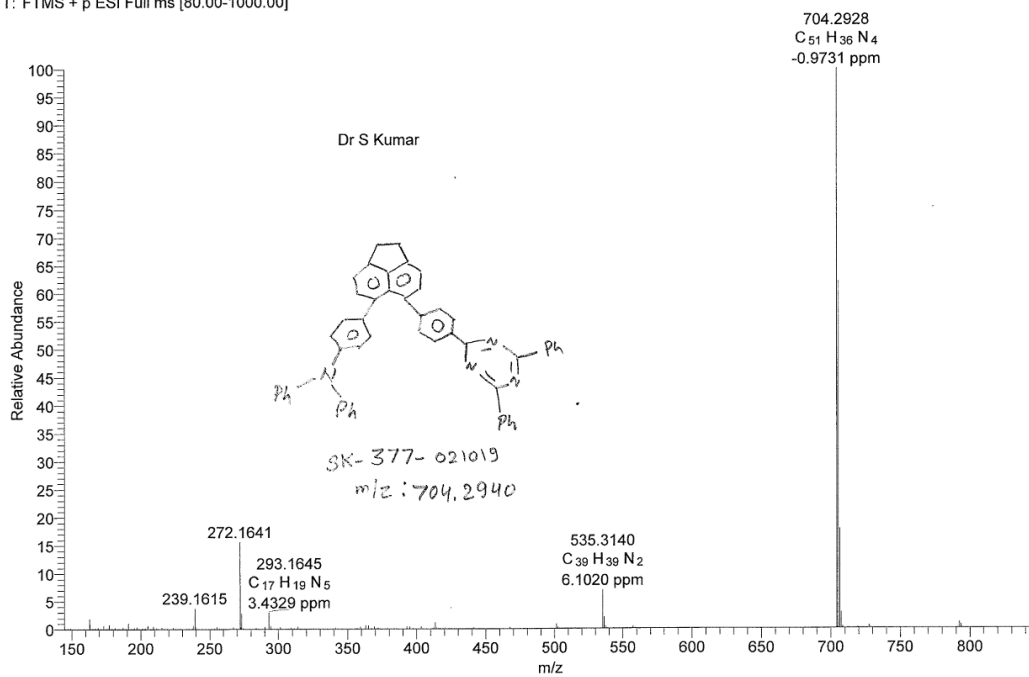

Figure S28. HRMS of TPA-ace-TRZ.

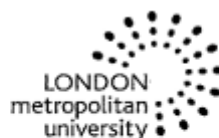

**Elemental Analysis Service**

Please send completed form and samples to:

Stephen Boyer  
 School of Human Sciences  
 Science Centre  
 London Metropolitan University  
 29 Hornsey Road  
 London N7 7DD

Telephone: 020 7133 3605  
 Fax: 020 7133 2577  
 Email: [s.boyer@londonmet.ac.uk](mailto:s.boyer@londonmet.ac.uk)

|                                                                                                 |                                                                           |
|-------------------------------------------------------------------------------------------------|---------------------------------------------------------------------------|
| Sample submitted by: <b>Dr Shiv Kumar</b>                                                       |                                                                           |
| Address: <b>EZC Group, North Haugh, School of Chemistry, University of St Andrews, KY16 9ST</b> |                                                                           |
| Telephone: <b>01334 463848</b>                                                                  | Email: <a href="mailto:sk240@st-andrews.ac.uk">sk240@st-andrews.ac.uk</a> |
| Date Submitted: <b>04/10/2019</b>                                                               |                                                                           |

Please submit ca. 5 mg of sample.

|                                                           |
|-----------------------------------------------------------|
| Sample Reference No.: <b>SK-377-021019</b>                |
| Name of Compound: <b>TPA-ace-TRZ</b>                      |
| Molecular Formula: <b>C51H36N4</b>                        |
| Stability: <b>Stable at room temperature and pressure</b> |
| Hazards: <b>Unknown</b>                                   |
| Other Remarks:                                            |

| Element  | Expected % | Found (1) | Found (2) |
|----------|------------|-----------|-----------|
| Carbon   | 86.90      | 86.71     | 86.81     |
| Hydrogen | 5.15       | 5.02      | 5.09      |
| Nitrogen | 7.95       | 8.06      | 8.12      |

Authorising Signature:

|                                 |            |
|---------------------------------|------------|
| Date Completed: <b>27/10/19</b> | Signature: |
| Comments:                       |            |

Figure S29. Elemental analysis report for **TPA-Ace-TRZ**.

# HPLC Trace Report24Nov2020

## <Sample Information>

Sample Name : TPA-ace-TRZ  
 Sample ID :  
 Method Filename : 98% Acetonitrile 2 Water 20 mins.lcm  
 Batch Filename : Shiv\_TPA-ace-TRZ.lcb  
 Vial # : 2-49  
 Injection Volume : 2 uL  
 Date Acquired : 24/11/2020 09:26:45  
 Date Processed : 24/11/2020 09:51:47  
 Sample Type : Unknown  
 Acquired by : System Administrator  
 Processed by : System Administrator

## <Chromatogram>

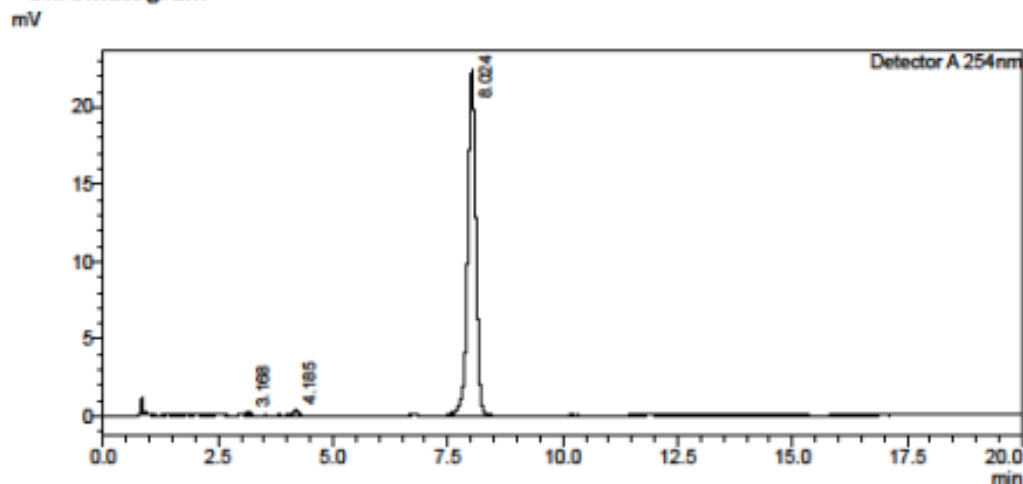

## <Peak Table>

| Detector A 254nm |           |        |        |         |             |                    |
|------------------|-----------|--------|--------|---------|-------------|--------------------|
| Peak#            | Ret. Time | Area   | Height | Area%   | Area/Height | Width at 5% Height |
| 1                | 3.168     | 1369   | 222    | 0.491   | 6.161       | --                 |
| 2                | 4.185     | 2907   | 399    | 1.043   | 7.289       | 0.239              |
| 3                | 8.024     | 274351 | 22287  | 98.466  | 12.310      | 0.429              |
| Total            |           | 278628 | 22908  | 100.000 |             |                    |

Figure S30. HPLC analysis report for TPA-ace-TRZ.

## Single crystal X-ray diffraction analysis

X-ray diffraction data for all compounds were collected at 173 K using a Rigaku FR-X Ultrahigh Brilliance Microfocus RA generator/confocal optics with XtaLAB P200 diffractometer [Mo K $\alpha$  radiation ( $\lambda = 0.71075 \text{ \AA}$ )]. Intensity data were collected using  $\omega$  steps accumulating area detector images spanning at least a hemisphere of reciprocal space. Data for all compounds



analysed were collected using CrystalClear<sup>8</sup> and processed (including correction for Lorentz, polarization and absorption) using CrysAlisPro.<sup>9</sup> Structures were solved by direct methods (SIR2004<sup>10</sup>) and refined by full-matrix least-squares against F<sup>2</sup> (SHELXL-2018/3<sup>11</sup>). Non-hydrogen atoms were refined anisotropically, and hydrogen atoms were refined using a riding model. The structure of **2TPA-ace** affected by non-merohedral twinning, with a twin law [1 0 0 0.178 0 -1β] and refined twin fraction of 0.21. All calculations were performed using the CrystalStructure<sup>12</sup> interface. Selected crystallographic data are presented in Table **S1**, and views of the structures and their packing are presented in Figure S31. Deposition numbers 2041945-2041948 contains the supplementary crystallographic data for this paper. These data are provided free of charge by the joint Cambridge Crystallographic Data Centre and Fachinformationszentrum Karlsruhe Access Structures service [www.ccdc.cam.ac.uk/structures](http://www.ccdc.cam.ac.uk/structures).

Table S1. Selected crystallographic data.

|                                                             | <b>TPA-ace</b>                        | <b>TPA-ace-CN</b>                              | <b>2TPA-ace</b>                                | <b>TPA-ace-TRZ</b>                             |
|-------------------------------------------------------------|---------------------------------------|------------------------------------------------|------------------------------------------------|------------------------------------------------|
| empirical formula                                           | C <sub>30.5</sub> H <sub>24</sub> ClN | C <sub>31</sub> H <sub>22</sub> N <sub>2</sub> | C <sub>48</sub> H <sub>36</sub> N <sub>2</sub> | C <sub>51</sub> H <sub>36</sub> N <sub>4</sub> |
| fw                                                          | 439.98                                | 422.53                                         | 640.83                                         | 704.87                                         |
| crystal description                                         | Yellow Prism                          | Orange chip                                    | Orange prism                                   | Orange prism                                   |
| crystal size [mm <sup>3</sup> ]                             | 0.13×0.06×0.01                        | 0.09×0.09×0.07                                 | 0.24×0.08×0.06                                 | 0.09×0.09×0.02                                 |
| space group                                                 | <i>C2/c</i>                           | <i>Cc</i>                                      | <i>P2/c</i>                                    | <i>P</i> $\bar{1}$                             |
| <i>a</i> [Å]                                                | 25.1888(14)                           | 9.0560(3)                                      | 13.9080(7)                                     | 10.8393(3)                                     |
| <i>b</i> [Å]                                                | 7.4270(3)                             | 16.5151(5)                                     | 9.4513(5)                                      | 12.3707(3)                                     |
| <i>c</i> [Å]                                                | 25.1491(14)                           | 15.0808(4)                                     | 26.3678(13)                                    | 13.7273(3)                                     |
| $\alpha$ [°]                                                |                                       |                                                |                                                | 89.441(2)                                      |
| $\beta$ [°]                                                 | 107.297(6)                            | 102.313(3)                                     | 99.727(5)                                      | 80.964(2)                                      |
| $\gamma$ [°]                                                |                                       |                                                |                                                | 88.169(2)                                      |
| vol [Å <sup>3</sup> ]                                       | 4492.1(4)                             | 2203.61(12)                                    | 3416.2(3)                                      | 1816.90(8)                                     |
| <i>Z</i>                                                    | 8                                     | 4                                              | 4                                              | 2                                              |
| $\rho$ (calc) [g/cm <sup>3</sup> ]                          | 1.301                                 | 1.273                                          | 1.246                                          | 1.288                                          |
| $\mu$ [mm <sup>-1</sup> ]                                   | 0.189                                 | 0.074                                          | 0.072                                          | 0.076                                          |
| F(000)                                                      | 1848                                  | 888                                            | 1352                                           | 740                                            |
| reflections collected                                       | 28249                                 | 14251                                          | 43282                                          | 24016                                          |
| independent reflections ( <i>R</i> <sub>int</sub> )         | 5210 (0.0546)                         | 4793 (0.0294)                                  | 7975 (0.0584)                                  | 7964 (0.0380)                                  |
| parameters, restraints                                      | 294, 0                                | 298, 2                                         | 452, 0                                         | 496, 0                                         |
| GOF on <i>F</i> <sup>2</sup>                                | 1.058                                 | 1.046                                          | 1.061                                          | 1.031                                          |
| <i>R</i> <sub>I</sub> [ <i>I</i> > 2 $\sigma$ ( <i>I</i> )] | 0.0665                                | 0.0360                                         | 0.0603                                         | 0.0482                                         |
| <i>wR</i> <sub>2</sub> (all data)                           | 0.1945                                | 0.0929                                         | 0.1732                                         | 0.1118                                         |
| largest diff. peak/hole [e/Å <sup>3</sup> ]                 | 0.40, -0.81                           | 0.17, -0.18                                    | 0.24, -0.28                                    | 0.21, -0.21                                    |

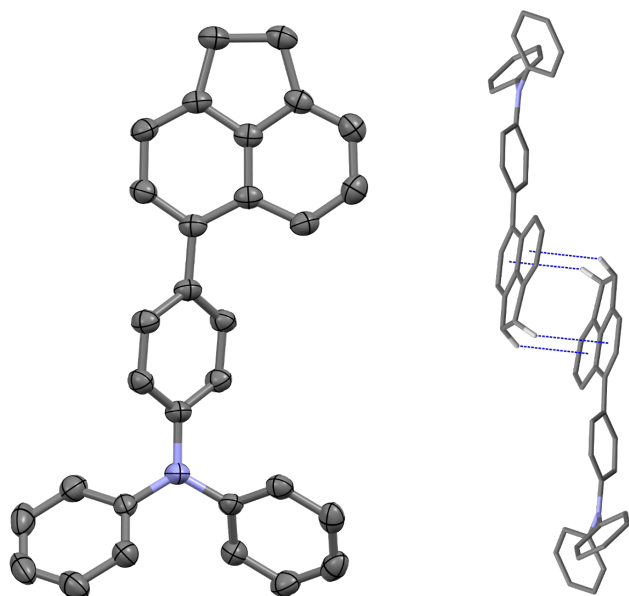

**Figure S31** X-ray structure of **TPA-ace** (left) Thermal-ellipsoid plot (ellipsoids drawn at the 50% probability level, hydrogens omitted) and (right) view of the CH... $\pi$  interactions, leading to formation of dimers (non-interacting hydrogens omitted).

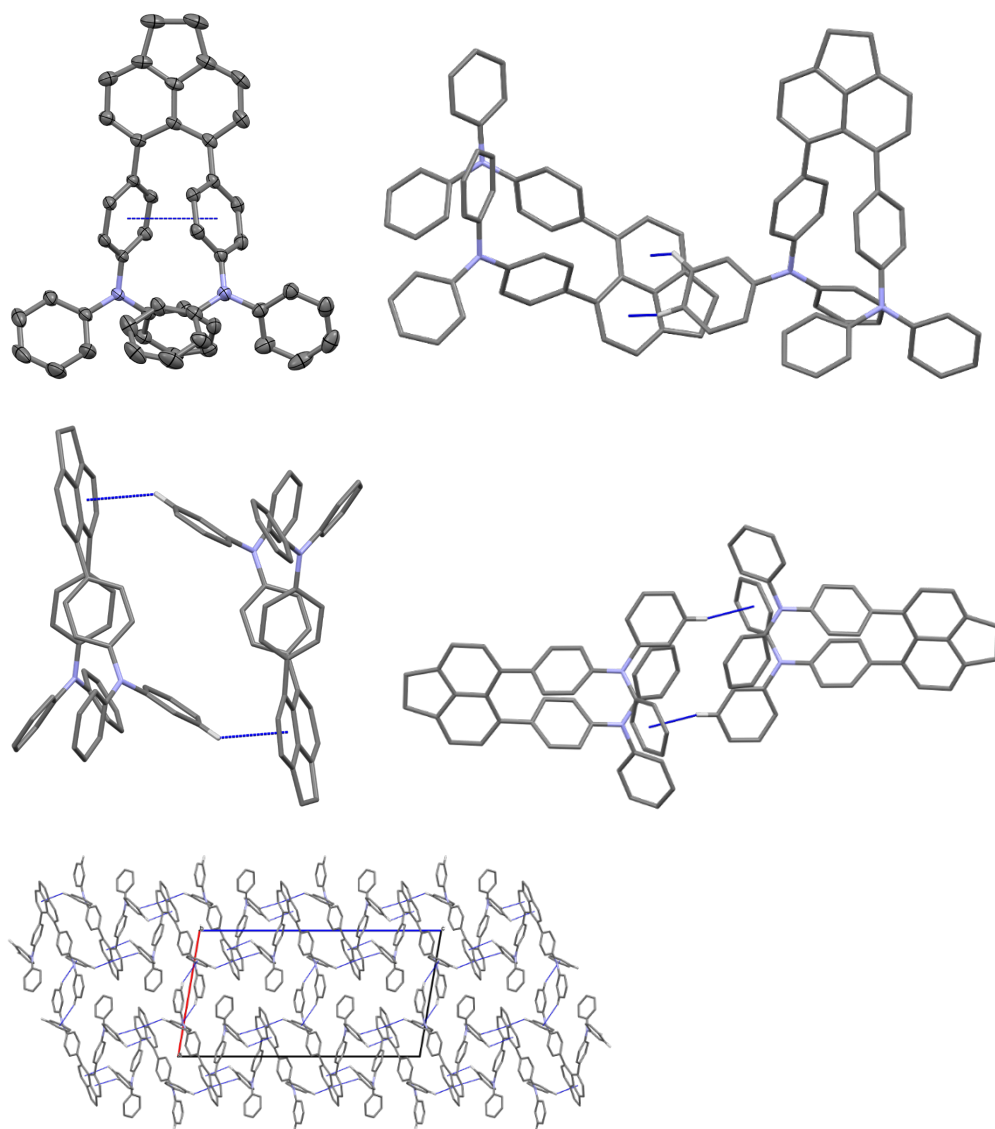

**Figure S32.** X-ray structure of **2TPA-ace** (a) Thermal-ellipsoid plot, showing the intramolecular  $\pi\cdots\pi$  interaction (ellipsoids drawn at the 50% probability level, hydrogens omitted), (b-e) views of the intermolecular interactions and packing (non-interacting hydrogens omitted): (b-d) the four different sets of  $\text{CH}\cdots\pi$  interactions, (e) view of the packing down the crystallographic  $b$ -axis.

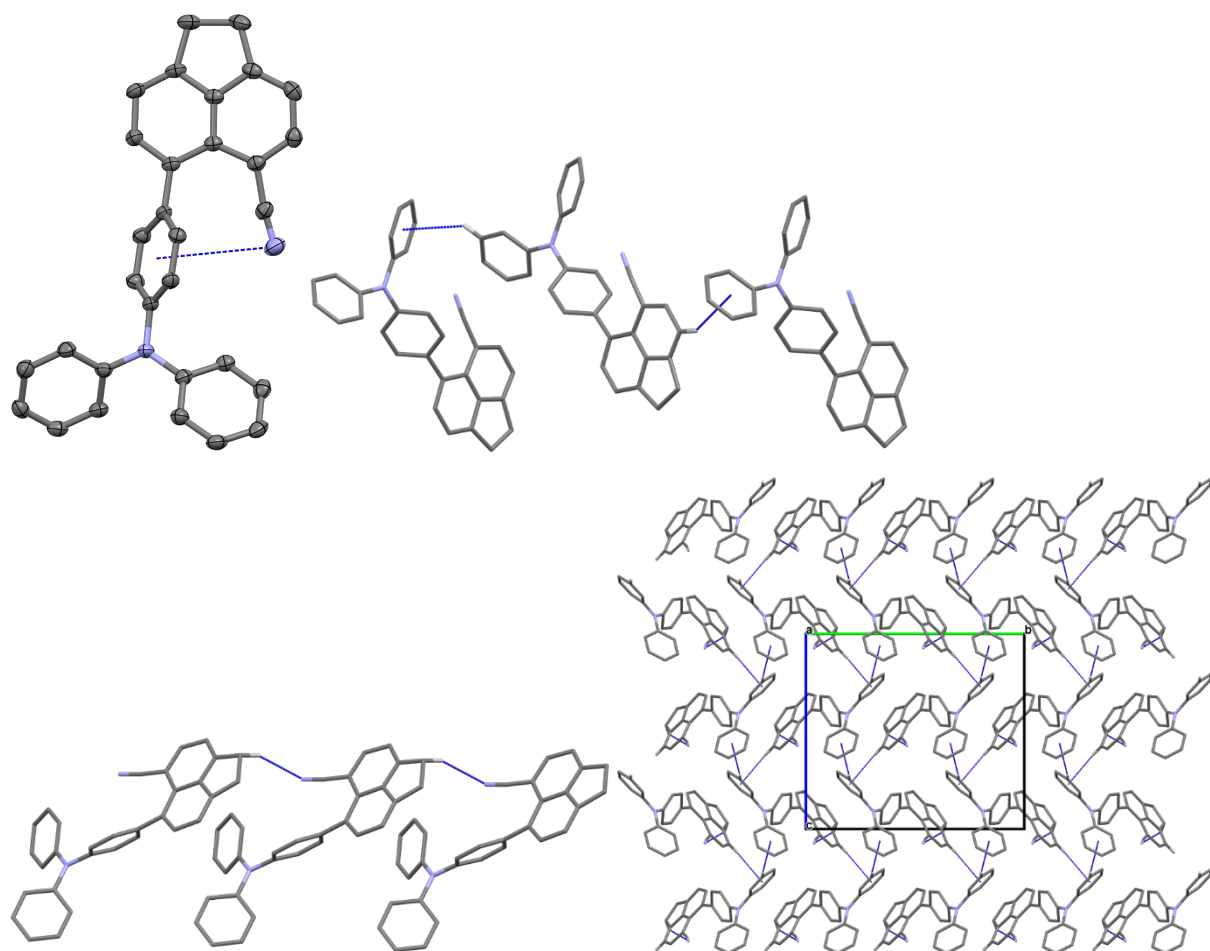

**Figure S33.** X-ray structure of TPA-ace-CN (a) Thermal-ellipsoid plot, showing the intramolecular CN... $\pi$  interaction (ellipsoids drawn at the 50% probability level, hydrogens omitted), (b-d) views of the intermolecular interactions and packing (non-interacting hydrogens omitted): (b) CH... $\pi$  interactions, (c) CH...N hydrogen bonds (e) view of the packing down the crystallographic *a*-axis.

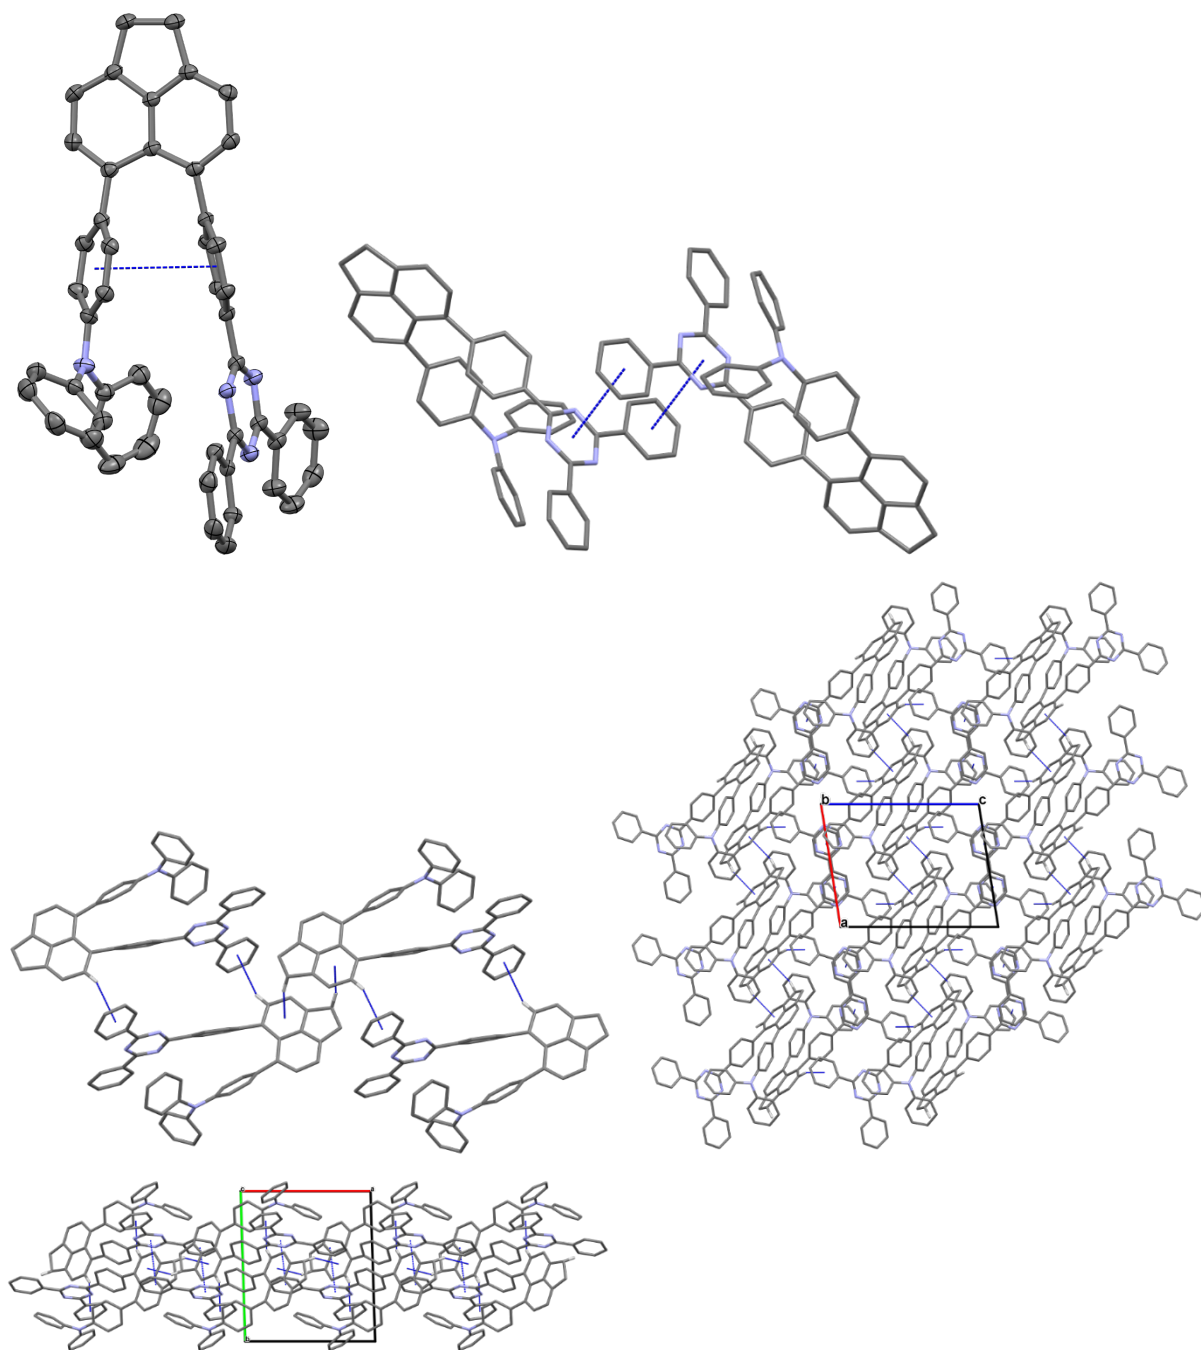

**Figure S34.** X-ray structure of **TPA-ace-TRZ** (a) Thermal-ellipsoid plot, showing the intramolecular  $\pi\cdots\pi$  interaction (ellipsoids drawn at the 50% probability level, hydrogens omitted), (b-e) views of the intermolecular interactions and packing (non-interacting hydrogens omitted): (b)  $\pi\cdots\pi$  interactions, (c) the two different sets of  $\text{CH}\cdots\pi$  interactions, (d) view of the packing down the crystallographic  $b$ -axis (e) view of one two-dimensional sheet in the  $ac$ -plane.

## Cartesian coordinates of the ground-state optimized geometries

### *TPA-ace*

|   |             |             |             |
|---|-------------|-------------|-------------|
| C | -4.30193200 | 2.58788900  | 0.38458400  |
| C | -3.27562100 | 1.67155800  | 0.28418800  |
| C | -3.55987000 | 0.29898600  | 0.06278900  |
| C | -4.92647800 | -0.04209000 | -0.00893000 |
| C | -5.97444900 | 0.89469900  | 0.09146900  |
| C | -5.66612900 | 2.21910900  | 0.28187300  |
| H | -4.05676100 | 3.63217900  | 0.55773300  |
| H | -2.24724300 | 1.99974400  | 0.39125600  |
| C | -2.62529300 | -0.77863200 | -0.05415800 |
| C | -5.40606000 | -1.35649700 | -0.16683400 |
| H | -6.43881300 | 2.97821600  | 0.36720500  |
| C | -4.49487100 | -2.38009400 | -0.25021600 |
| C | -3.11632200 | -2.06898700 | -0.19514800 |
| H | -4.80548400 | -3.41434100 | -0.37020300 |
| H | -2.39752900 | -2.87782800 | -0.29677600 |
| C | -7.29425000 | 0.16971600  | -0.02992600 |
| H | -7.91746100 | 0.32970700  | 0.85660900  |
| H | -7.87095300 | 0.53743500  | -0.88572100 |
| C | -6.91515100 | -1.33076000 | -0.19929600 |
| H | -7.34010900 | -1.94570900 | 0.60163200  |
| H | -7.29903700 | -1.73893600 | -1.14077200 |
| C | -1.16623900 | -0.55251000 | -0.02910600 |
| C | -0.33550300 | -1.33713500 | 0.78053900  |
| C | -0.55915700 | 0.42068900  | -0.83414300 |
| C | 1.03871800  | -1.15349000 | 0.80023600  |
| H | -0.78481400 | -2.08203300 | 1.43126500  |
| C | 0.81569000  | 0.60123000  | -0.83480800 |
| H | -1.17430400 | 1.01824300  | -1.50026200 |
| C | 1.63341900  | -0.18059100 | -0.01089400 |
| H | 1.66330300  | -1.75798400 | 1.45003500  |
| H | 1.26920500  | 1.34534400  | -1.48156500 |
| N | 3.02990600  | 0.00592200  | 0.00016700  |
| C | 3.88762700  | -1.11203200 | 0.06222200  |
| C | 5.04594900  | -1.07470000 | 0.84699900  |
| C | 3.58995400  | -2.27292800 | -0.66057400 |
| C | 5.89156000  | -2.17566800 | 0.89577700  |
| H | 5.27549500  | -0.17718100 | 1.41221200  |
| C | 4.43228600  | -3.37509500 | -0.58936200 |
| H | 2.69485400  | -2.30135800 | -1.27345700 |
| C | 5.58994300  | -3.33377200 | 0.18357100  |
| H | 6.78699200  | -2.13114000 | 1.50895300  |
| H | 4.18743200  | -4.26870600 | -1.15615900 |
| H | 6.24962500  | -4.19444800 | 0.23072900  |
| C | 3.56862300  | 1.30736800  | -0.06643800 |
| C | 4.71158600  | 1.56396100  | -0.83243900 |
| C | 2.96552100  | 2.35947000  | 0.63254300  |
| C | 5.24197900  | 2.84668200  | -0.88708300 |

|   |            |            |             |
|---|------------|------------|-------------|
| H | 5.17780100 | 0.75073600 | -1.37918100 |
| C | 3.49291300 | 3.64214200 | 0.55514800  |
| H | 2.08272500 | 2.16123900 | 1.23177500  |
| C | 4.63561300 | 3.89496000 | -0.19965200 |
| H | 6.12956800 | 3.02931800 | -1.48590400 |
| H | 3.01302600 | 4.44786700 | 1.10316000  |
| H | 5.04881700 | 4.89731600 | -0.25133100 |

*2TPA-ace*

|   |             |             |             |
|---|-------------|-------------|-------------|
| C | -4.05834900 | -2.48999400 | -1.42778000 |
| C | -3.40279700 | -1.53243100 | -0.66625600 |
| C | -4.18856200 | -0.56166900 | 0.03596800  |
| C | -5.58307600 | -0.77315100 | 0.03651400  |
| C | -6.23008500 | -1.77081500 | -0.71910000 |
| C | -5.46562100 | -2.60699500 | -1.49462300 |
| H | -3.44949400 | -3.22961400 | -1.94109700 |
| C | -3.73212900 | 0.60066700  | 0.73595500  |
| C | -6.49743600 | -0.00853200 | 0.78868100  |
| H | -5.91105600 | -3.38583700 | -2.10732700 |
| C | -6.01862400 | 1.02232300  | 1.55803500  |
| C | -4.63894300 | 1.32760600  | 1.49161500  |
| H | -6.67610900 | 1.63659600  | 2.16685500  |
| H | -4.27479400 | 2.21397000  | 2.00455300  |
| C | -7.71964900 | -1.67280800 | -0.49409100 |
| H | -8.23859900 | -1.42294200 | -1.42647200 |
| H | -8.14042300 | -2.62335100 | -0.14944900 |
| C | -7.89051900 | -0.54564400 | 0.56496600  |
| H | -8.57564500 | 0.23663800  | 0.22166400  |
| H | -8.30952500 | -0.93861700 | 1.49824400  |
| C | -2.38194000 | 1.17210500  | 0.50934100  |
| C | -1.46449200 | 1.39053600  | 1.53840300  |
| C | -2.04961200 | 1.58536100  | -0.78669000 |
| C | -0.23683400 | 1.99107100  | 1.27723800  |
| H | -1.70927400 | 1.07085800  | 2.54712200  |
| C | -0.84043700 | 2.21032000  | -1.04637300 |
| H | -2.76133100 | 1.42032400  | -1.59008000 |
| C | 0.07937100  | 2.40652800  | -0.01547800 |
| H | 0.48330400  | 2.15440500  | 2.07350200  |
| H | -0.59306300 | 2.55546000  | -2.04579200 |
| N | 1.33054300  | 3.03216400  | -0.27937400 |
| C | 2.45664400  | 2.20120400  | -0.46679100 |
| C | 3.68933500  | 2.54819700  | 0.09930900  |
| C | 2.34884600  | 1.01194200  | -1.19484800 |
| C | 4.79562200  | 1.72919000  | -0.08207800 |
| H | 3.76574800  | 3.46442900  | 0.67648800  |
| C | 3.45995700  | 0.19316500  | -1.36214600 |
| H | 1.38936500  | 0.72331000  | -1.61153600 |
| C | 4.68828400  | 0.54920400  | -0.81510500 |
| H | 5.74504200  | 2.00773800  | 0.36567800  |
| H | 3.36356700  | -0.73216100 | -1.92184000 |



|   |             |             |             |
|---|-------------|-------------|-------------|
| H | 5.55529600  | -0.08937500 | -0.95385600 |
| C | 1.35695700  | 4.40291300  | -0.56947700 |
| C | 2.36652600  | 4.96571800  | -1.36408200 |
| C | 0.34640600  | 5.24015900  | -0.07361200 |
| C | 2.36814700  | 6.32832800  | -1.63277400 |
| H | 3.14384500  | 4.33057500  | -1.77433700 |
| C | 0.35534400  | 6.59851800  | -0.36159300 |
| H | -0.44377300 | 4.81736000  | 0.53764100  |
| C | 1.36639800  | 7.15844800  | -1.13738000 |
| H | 3.16002800  | 6.74106500  | -2.25167200 |
| H | -0.43786400 | 7.22628300  | 0.03475000  |
| H | 1.37179800  | 8.22163300  | -1.35504400 |
| C | -1.94697900 | -1.67657300 | -0.44549500 |
| C | -1.46998700 | -1.79956000 | 0.86525500  |
| C | -1.02614000 | -1.81138500 | -1.48798800 |
| C | -0.13853600 | -2.06723000 | 1.12900600  |
| H | -2.17173000 | -1.71841800 | 1.69019200  |
| C | 0.31836600  | -2.05259700 | -1.23420700 |
| H | -1.36515100 | -1.70341300 | -2.51477100 |
| C | 0.77919100  | -2.19841500 | 0.08056700  |
| H | 0.20185500  | -2.18589100 | 2.15212700  |
| H | 1.01925200  | -2.14377600 | -2.05793900 |
| N | 2.13145700  | -2.47988800 | 0.35438200  |
| C | 2.73867900  | -1.92954300 | 1.50778800  |
| C | 3.57021600  | -2.71243500 | 2.31458700  |
| C | 2.51145400  | -0.59367400 | 1.85173400  |
| C | 4.18202000  | -2.15608100 | 3.43192700  |
| H | 3.73846800  | -3.75275100 | 2.05512700  |
| C | 3.11656600  | -0.05087300 | 2.97662300  |
| H | 1.87147000  | 0.01440700  | 1.22356200  |
| C | 3.95969700  | -0.82419900 | 3.77121400  |
| H | 4.82831300  | -2.77490700 | 4.04772600  |
| H | 2.94397100  | 0.99424000  | 3.21743500  |
| H | 4.43931200  | -0.39364800 | 4.64478900  |
| C | 2.85933700  | -3.36308000 | -0.46645500 |
| C | 4.22541900  | -3.15076800 | -0.69521200 |
| C | 2.23787600  | -4.46875600 | -1.06009200 |
| C | 4.94498600  | -4.02237900 | -1.50216800 |
| H | 4.71203700  | -2.30093700 | -0.22905200 |
| C | 2.96398500  | -5.32441700 | -1.87903100 |
| H | 1.18407200  | -4.64925300 | -0.87580900 |
| C | 4.32100000  | -5.11098300 | -2.10625500 |
| H | 6.00296400  | -3.84003200 | -1.66801600 |
| H | 2.46362900  | -6.17595500 | -2.33120300 |
| H | 4.88518800  | -5.78545000 | -2.74248200 |

*TPA-ace-Br*

|   |            |            |             |
|---|------------|------------|-------------|
| C | 2.93006500 | 2.38671900 | 0.88404400  |
| C | 2.39371500 | 1.20034200 | 0.41317500  |
| C | 3.27647500 | 0.15701500 | -0.01372400 |

|    |             |             |             |
|----|-------------|-------------|-------------|
| C  | 4.66150900  | 0.41841800  | 0.14213700  |
| C  | 5.18352600  | 1.63195300  | 0.63741300  |
| C  | 4.31679100  | 2.63054200  | 0.99757300  |
| H  | 2.23404300  | 3.15902900  | 1.19934700  |
| C  | 2.98621500  | -1.11561100 | -0.58955600 |
| C  | 5.69151600  | -0.48721000 | -0.18292300 |
| H  | 4.66821300  | 3.58565400  | 1.37747300  |
| C  | 5.35746700  | -1.71238000 | -0.70023900 |
| C  | 3.99249000  | -2.00593000 | -0.90684500 |
| H  | 6.10829900  | -2.45051800 | -0.96648100 |
| H  | 3.71509600  | -2.95969200 | -1.34256100 |
| C  | 7.02820500  | 0.13559200  | 0.13304500  |
| H  | 7.67327600  | 0.16653400  | -0.75148900 |
| H  | 7.56386400  | -0.44966400 | 0.88862200  |
| C  | 6.69071000  | 1.56092800  | 0.65086200  |
| H  | 7.12472600  | 2.33456900  | 0.00800700  |
| H  | 7.08864700  | 1.73273000  | 1.65667300  |
| C  | 0.91811300  | 1.04082900  | 0.41983400  |
| C  | 0.29731900  | 0.32822000  | 1.44919200  |
| C  | 0.12673000  | 1.56466800  | -0.60282600 |
| C  | -1.06929600 | 0.10351100  | 1.43372200  |
| H  | 0.90132300  | -0.06928600 | 2.25947800  |
| C  | -1.23872100 | 1.32095800  | -0.64207300 |
| H  | 0.59802300  | 2.11964700  | -1.40855000 |
| C  | -1.84598600 | 0.56508000  | 0.36541700  |
| H  | -1.54427400 | -0.46210400 | 2.22880000  |
| H  | -1.83974200 | 1.69247100  | -1.46566800 |
| Br | 1.22752200  | -1.67656600 | -1.03471200 |
| N  | -3.21805900 | 0.24402900  | 0.30073300  |
| C  | -3.63230500 | -1.07877700 | 0.56020500  |
| C  | -4.87622100 | -1.32414200 | 1.15436900  |
| C  | -2.80767800 | -2.16312800 | 0.23435500  |
| C  | -5.28892700 | -2.62712500 | 1.40103800  |
| H  | -5.51346600 | -0.48599700 | 1.41705300  |
| C  | -3.22383800 | -3.46074400 | 0.50335800  |
| H  | -1.83404800 | -1.98181400 | -0.20941200 |
| C  | -4.46699700 | -3.70471400 | 1.08088200  |
| H  | -6.25739500 | -2.79856600 | 1.86211000  |
| H  | -2.57011200 | -4.28937900 | 0.24686000  |
| H  | -4.78960000 | -4.72123600 | 1.28271000  |
| C  | -4.13701500 | 1.20366700  | -0.17108200 |
| C  | -4.03366500 | 2.53459300  | 0.24988700  |
| C  | -5.15126600 | 0.84918300  | -1.06784900 |
| C  | -4.92335800 | 3.48937300  | -0.22529600 |
| H  | -3.24888400 | 2.80929200  | 0.94747800  |
| C  | -6.04792400 | 1.80837500  | -1.52202800 |
| H  | -5.22922300 | -0.18005300 | -1.40242000 |
| C  | -5.93922600 | 3.13375500  | -1.10917300 |
| H  | -4.82898000 | 4.51800900  | 0.11057100  |
| H  | -6.82939800 | 1.51719600  | -2.21796700 |
| H  | -6.63778300 | 3.88103900  | -1.47217800 |

*TPA-ace-CN*

|   |             |             |             |
|---|-------------|-------------|-------------|
| C | -4.05021200 | 2.24365000  | 0.97652800  |
| C | -3.05782900 | 1.32559900  | 0.64519000  |
| C | -3.41277900 | 0.05019600  | 0.09576800  |
| C | -4.79925300 | -0.18474000 | -0.02190600 |
| C | -5.79668800 | 0.75175400  | 0.31462700  |
| C | -5.42324500 | 1.97935300  | 0.80721200  |
| H | -3.74176400 | 3.19680600  | 1.39428000  |
| C | -2.55025300 | -1.00891700 | -0.31440400 |
| C | -5.35616300 | -1.39719100 | -0.47559600 |
| H | -6.15292800 | 2.73487400  | 1.08182800  |
| C | -4.50986900 | -2.42024700 | -0.82229700 |
| C | -3.11611300 | -2.20091900 | -0.73925400 |
| H | -4.88355500 | -3.37934100 | -1.16938700 |
| H | -2.44097500 | -2.99601000 | -1.04324900 |
| C | -7.15305900 | 0.15059000  | 0.04587600  |
| H | -7.77058100 | 0.14830900  | 0.95036000  |
| H | -7.69830300 | 0.73818500  | -0.70088000 |
| C | -6.86122900 | -1.29021300 | -0.45966800 |
| H | -7.30282600 | -2.04384900 | 0.20127500  |
| H | -7.28382500 | -1.46293900 | -1.45516800 |
| C | -1.71406100 | 1.71720900  | 0.94208800  |
| N | -0.66713300 | 2.12359400  | 1.24225500  |
| C | -1.07842500 | -0.84443600 | -0.31653800 |
| C | -0.46358300 | -0.01533700 | -1.26001900 |
| C | -0.27720100 | -1.48753400 | 0.62950100  |
| C | 0.90446000  | 0.19518400  | -1.23780300 |
| H | -1.07162900 | 0.47495900  | -2.01507900 |
| C | 1.09074900  | -1.26392900 | 0.67426300  |
| H | -0.74189700 | -2.13183200 | 1.37037000  |
| C | 1.69371100  | -0.40352300 | -0.24942200 |
| H | 1.37274800  | 0.84925000  | -1.96568200 |
| H | 1.69897900  | -1.73380700 | 1.43999000  |
| N | 3.07022100  | -0.11894100 | -0.17876500 |
| C | 3.50884200  | 1.21441600  | -0.34724800 |
| C | 4.70185700  | 1.48058600  | -1.02794900 |
| C | 2.75168300  | 2.27723100  | 0.15935800  |
| C | 5.13661200  | 2.79062700  | -1.18622200 |
| H | 5.28260800  | 0.65465900  | -1.42628100 |
| C | 3.18831000  | 3.58360100  | -0.02408000 |
| H | 1.82003500  | 2.08302200  | 0.68341000  |
| C | 4.38205100  | 3.85061800  | -0.68990600 |
| H | 6.06580000  | 2.98263500  | -1.71514700 |
| H | 2.58918100  | 4.39817900  | 0.37227700  |
| H | 4.72056000  | 4.87366600  | -0.82200900 |
| C | 3.98629700  | -1.13402000 | 0.15867300  |
| C | 5.06244600  | -0.87224300 | 1.01500800  |
| C | 3.82971600  | -2.42416800 | -0.36263100 |
| C | 5.96358600  | -1.88083100 | 1.33186700  |

|   |            |             |             |
|---|------------|-------------|-------------|
| H | 5.18438900 | 0.12491000  | 1.42494700  |
| C | 4.72582100 | -3.42966800 | -0.02397300 |
| H | 3.00012200 | -2.62766800 | -1.03209100 |
| C | 5.80136700 | -3.16585600 | 0.82045300  |
| H | 6.79303500 | -1.66092200 | 1.99787800  |
| H | 4.58918700 | -4.42478500 | -0.43755500 |
| H | 6.50474100 | -3.95192300 | 1.07650700  |

*TPA-ace-TRZ*

|   |             |             |             |
|---|-------------|-------------|-------------|
| C | -4.51840400 | -3.18805900 | -1.39426200 |
| C | -4.04112800 | -2.04976100 | -0.75804500 |
| C | -4.97819300 | -1.11666800 | -0.19912200 |
| C | -6.33636800 | -1.51794300 | -0.25594200 |
| C | -6.79581000 | -2.69354900 | -0.88573100 |
| C | -5.88475800 | -3.52470300 | -1.48449500 |
| H | -3.78417200 | -3.87641200 | -1.80389000 |
| C | -4.73619200 | 0.16653400  | 0.40132100  |
| C | -7.40721700 | -0.79281400 | 0.30599200  |
| H | -6.18454300 | -4.43785600 | -1.99064000 |
| C | -7.14017200 | 0.39242200  | 0.94126700  |
| C | -5.80839800 | 0.85430700  | 0.95767900  |
| H | -7.92513200 | 0.99262800  | 1.39252300  |
| H | -5.60670100 | 1.83146200  | 1.38752700  |
| C | -8.29663000 | -2.77952700 | -0.76393800 |
| H | -8.76963300 | -2.77155400 | -1.75228300 |
| H | -8.60607400 | -3.71158300 | -0.27912400 |
| C | -8.69994100 | -1.53260200 | 0.06889500  |
| H | -9.42834500 | -0.90763600 | -0.45871300 |
| H | -9.16585600 | -1.81849400 | 1.01857000  |
| C | -3.43125400 | 0.86669300  | 0.39929800  |
| C | -2.96469200 | 1.49017000  | 1.56317500  |
| C | -2.67749300 | 1.00590000  | -0.77199800 |
| C | -1.79393200 | 2.23637800  | 1.55699800  |
| H | -3.52776100 | 1.37817400  | 2.48546800  |
| C | -1.48966500 | 1.72201000  | -0.77644000 |
| H | -3.03881500 | 0.56035400  | -1.69224500 |
| C | -1.04614400 | 2.35528800  | 0.38501800  |
| H | -1.44972400 | 2.73846000  | 2.45627300  |
| H | -0.90725600 | 1.82621800  | -1.68635300 |
| N | 0.13275200  | 3.14757300  | 0.35362700  |
| C | 1.38929600  | 2.49520600  | 0.35244000  |
| C | 1.67593000  | 1.51479500  | 1.30412900  |
| C | 2.36146300  | 2.84709000  | -0.58906100 |
| C | 2.93339900  | 0.92215100  | 1.33599700  |
| H | 0.91278400  | 1.23484800  | 2.02352500  |
| C | 3.61304800  | 2.24487800  | -0.55751900 |
| H | 2.12356100  | 3.60247200  | -1.33170400 |
| C | 3.90813700  | 1.28837700  | 0.41197300  |
| H | 3.15352100  | 0.17718200  | 2.09437300  |
| H | 4.35902800  | 2.51269300  | -1.29983100 |

|   |             |             |             |
|---|-------------|-------------|-------------|
| H | 4.88476500  | 0.81579900  | 0.43446100  |
| C | 0.03499400  | 4.53217000  | 0.53505200  |
| C | 1.11799100  | 5.28276100  | 1.01705600  |
| C | -1.16476800 | 5.19744900  | 0.23818500  |
| C | 0.99955800  | 6.65679100  | 1.18177600  |
| H | 2.04810500  | 4.78391900  | 1.26562700  |
| C | -1.27011900 | 6.56983100  | 0.42041700  |
| H | -2.00981600 | 4.63069500  | -0.13773000 |
| C | -0.19150200 | 7.31506800  | 0.88890200  |
| H | 1.85183500  | 7.21609700  | 1.55781500  |
| H | -2.20916000 | 7.06186000  | 0.18233100  |
| H | -0.27798600 | 8.38836500  | 1.02451400  |
| C | -2.56912700 | -1.93170600 | -0.64387800 |
| C | -1.94387000 | -1.85058000 | 0.60586100  |
| C | -1.77239600 | -1.96523500 | -1.79423200 |
| C | -0.56247700 | -1.81512800 | 0.70233200  |
| H | -2.55460100 | -1.82198900 | 1.50281300  |
| C | -0.39185900 | -1.88705300 | -1.70460900 |
| H | -2.25337500 | -2.02450600 | -2.76664900 |
| C | 0.22536500  | -1.82625000 | -0.45293900 |
| H | -0.07181300 | -1.77675400 | 1.66891700  |
| H | 0.22902100  | -1.88670500 | -2.59426100 |
| C | 1.69354300  | -1.81242500 | -0.36023800 |
| C | 3.70781600  | -1.41936700 | -1.30173900 |
| C | 3.58423400  | -2.24725700 | 0.79704900  |
| N | 2.24866100  | -2.22104700 | 0.78489000  |
| N | 2.37959100  | -1.40321000 | -1.43111600 |
| N | 4.35805000  | -1.86851400 | -0.22307200 |
| C | 4.24865000  | -2.69638400 | 2.03645700  |
| C | 5.64372400  | -2.68269000 | 2.13395500  |
| C | 3.48395500  | -3.12357200 | 3.12700600  |
| C | 6.26411600  | -3.09134000 | 3.30702600  |
| H | 6.22115400  | -2.34681500 | 1.27968200  |
| C | 4.10842200  | -3.53110100 | 4.29846100  |
| H | 2.40360500  | -3.13043400 | 3.03191200  |
| C | 5.49849200  | -3.51551300 | 4.39114600  |
| H | 7.34756300  | -3.07816300 | 3.37841500  |
| H | 3.51072600  | -3.86311300 | 5.14205300  |
| H | 5.98538300  | -3.83408700 | 5.30832000  |
| C | 4.51190900  | -0.87415100 | -2.41160000 |
| C | 5.90652300  | -0.96860500 | -2.38712100 |
| C | 3.88083600  | -0.22294300 | -3.47614100 |
| C | 6.65973800  | -0.42227800 | -3.41811600 |
| H | 6.37943600  | -1.47311200 | -1.55169100 |
| C | 4.63773400  | 0.32624100  | -4.50259600 |
| H | 2.79887400  | -0.14978400 | -3.47010000 |
| C | 6.02747500  | 0.22693900  | -4.47647400 |
| H | 7.74259900  | -0.50080200 | -3.39716100 |
| H | 4.14439500  | 0.83630500  | -5.32458100 |
| H | 6.61801100  | 0.65717800  | -5.28021700 |

## Electrochemical properties

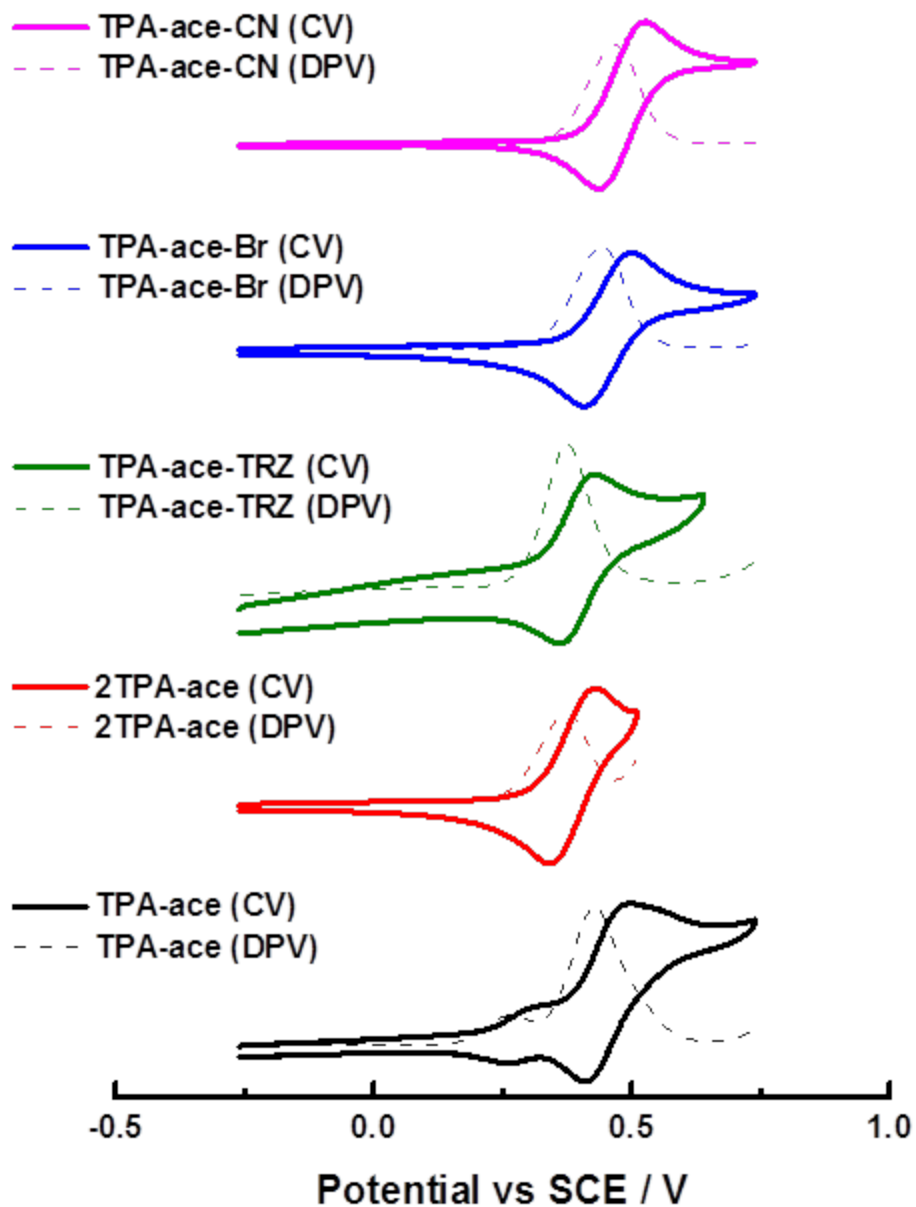

Figure S35. Anodic half wave cyclic voltammograms and DPV scans of the emitters (scans were carried out in degassed DCM at a scan rate of  $100 \text{ mV s}^{-1}$ ).

## Photophysical properties

Table S2. PLQY of the TPA-ace series in zeonex (1 wt% doping concentration, drop casted).

| Emitter     | PLQY Air; N <sub>2</sub> (%) <sup>a</sup> |
|-------------|-------------------------------------------|
| TPA-ace     | 20.1; 20.8                                |
| TPA-ace-Br  | 1.8; 2.8                                  |
| TPA-ace-CN  | 18.3; 18.8                                |
| TPA-ace-TRZ | 12.2; 12.2                                |
| 2TPA-ace    | 16.6; 17.0                                |

a:  $\lambda_{exc}$ : 340 nm

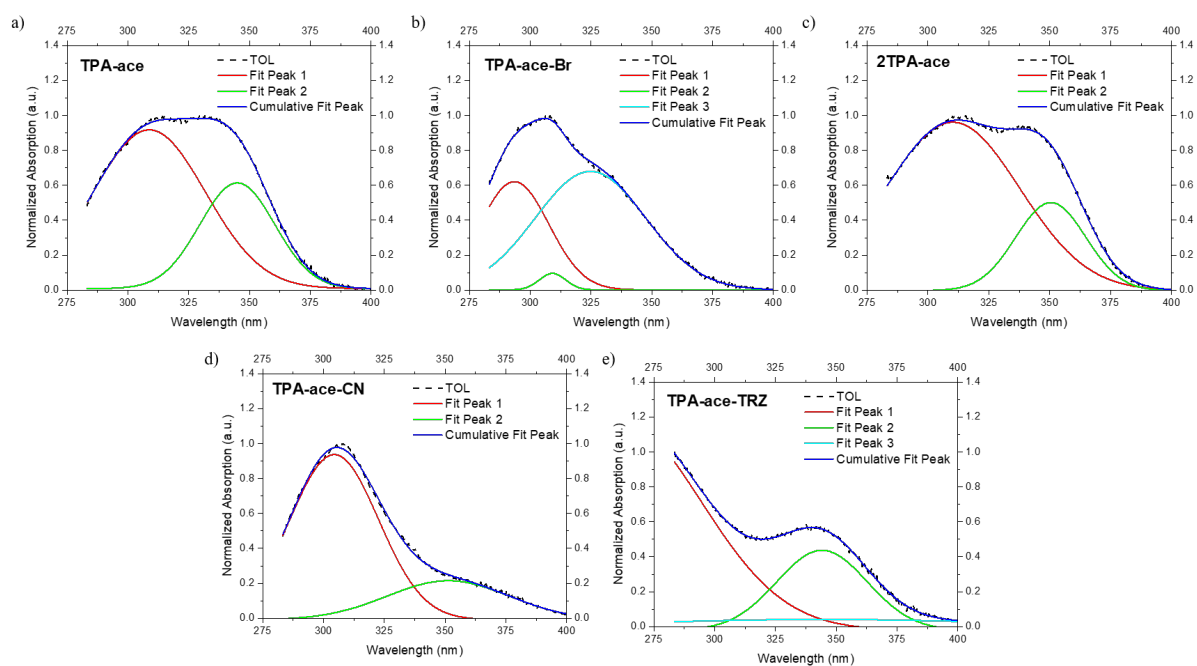

Figure S36. Deconvoluted absorption spectra of a) TPA-ace, b) TPA-ace-Br, c) 2TPA-ace, d)

TPA-ace-CN and e) TPA-ace-TRZ in toluene solution.

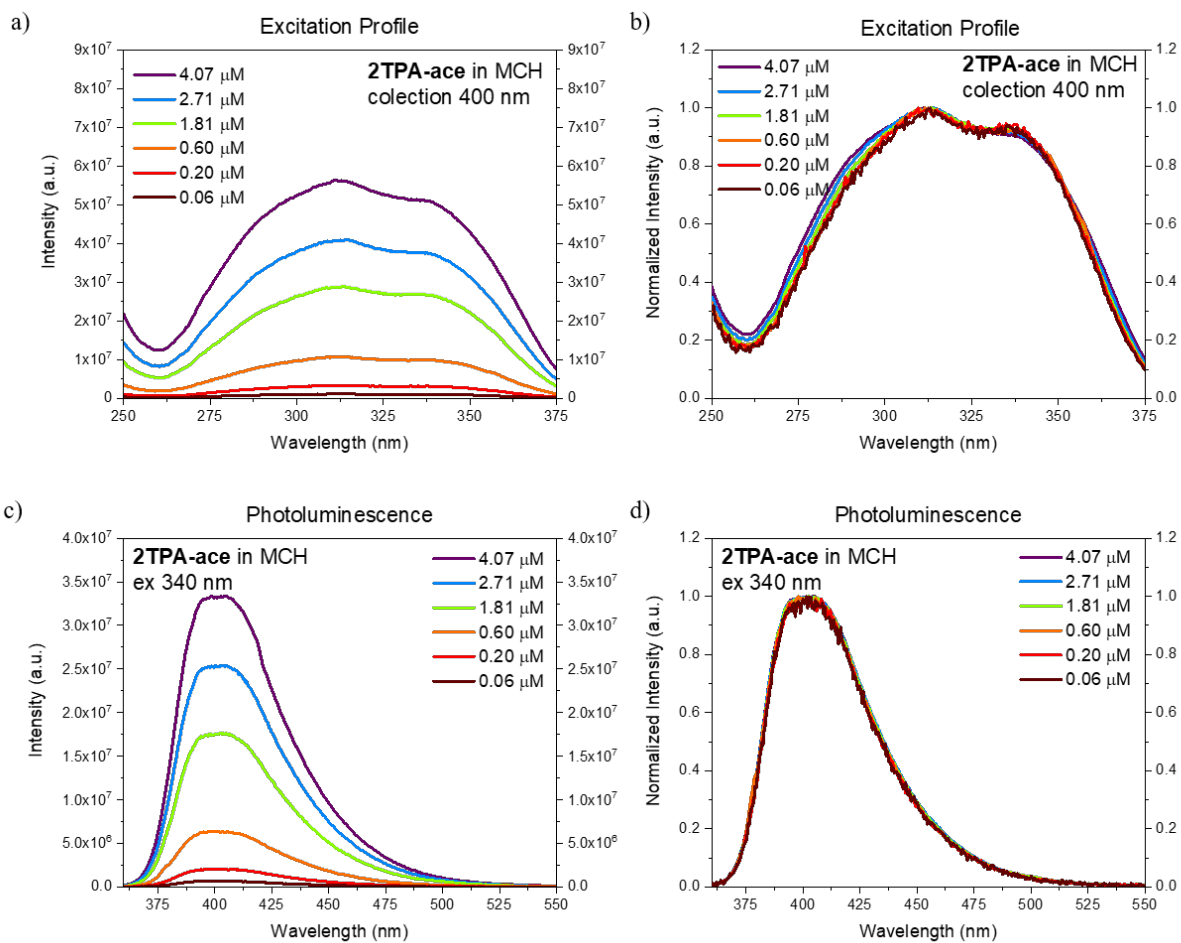

Figure S37. Concentration dependence of 2TPA-ace in MCH solution



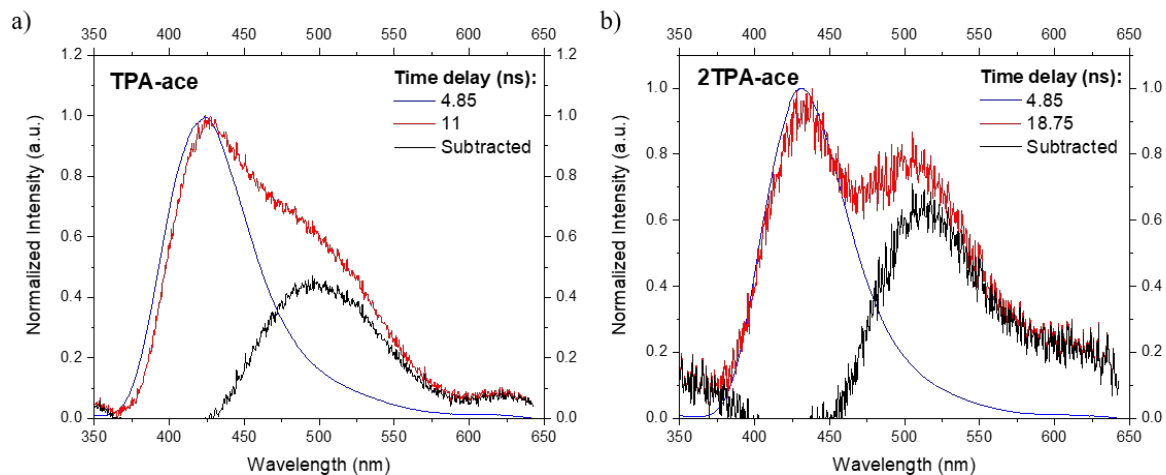

Figure S38. Peak of time-resolved spectra of a) **TPA-ace** and b) **2TPA-ace** in toluene solution, subtracting their respectively pure LE spectra.

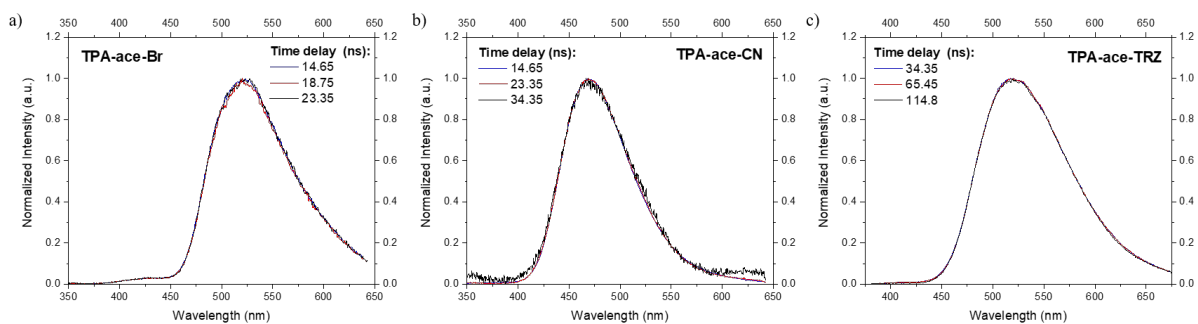

Figure S39. Peak of time-resolved spectra after stabilization of CT state for a) **TPA-ace-Br**, b) **TPA-ace-CN** and c) **TPA-ace-TRZ** in toluene solution.

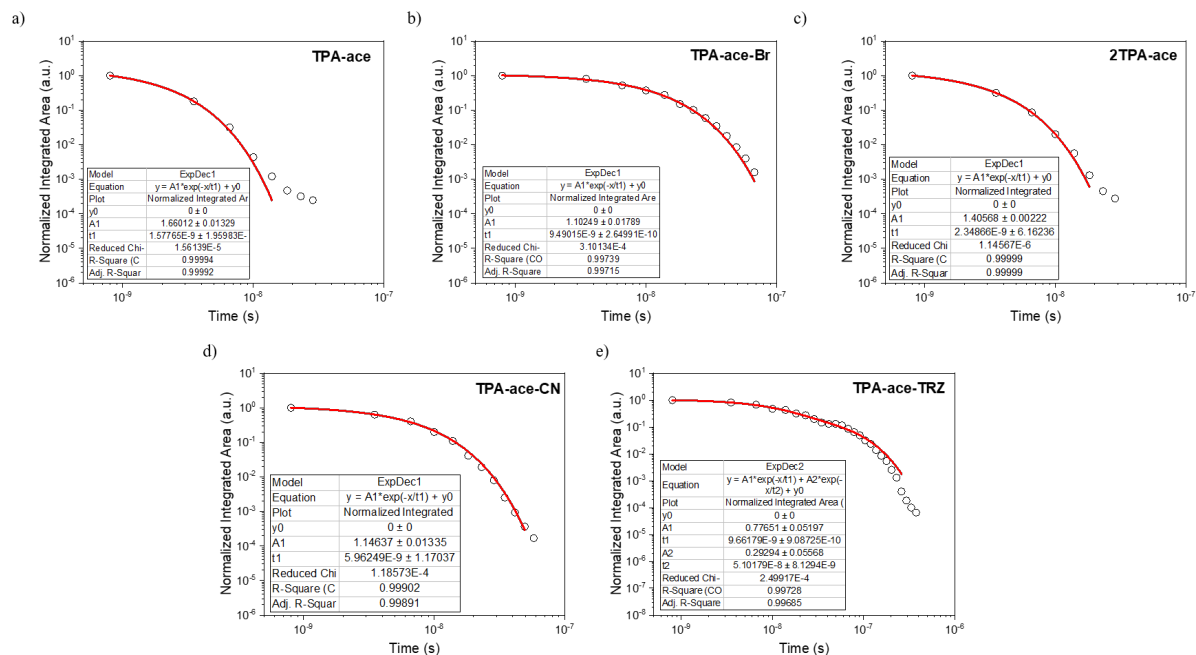

Figure S40. Fitting of kinetic decay results for a) TPA-ace, b) TPA-ace-Br, c) 2TPA-ace, d) TPA-ace-CN and e) TPA-ace-TRZ in toluene solution.

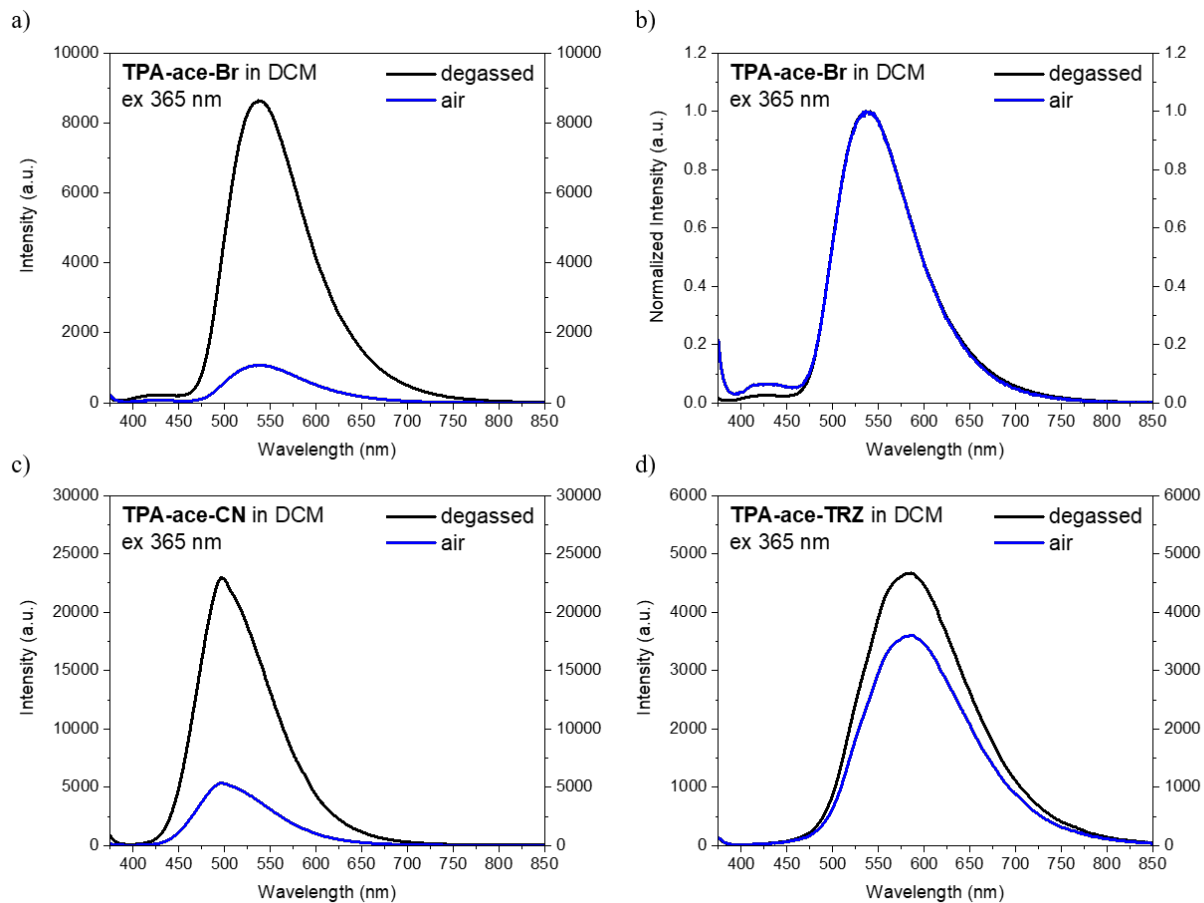

Figure S41. Oxygen quenching of total luminescence signal from for a) **TPA-ace-Br**, b) **TPA-ace-Br** (normalised), c) **TPA-ace-CN** and d) **TPA-ace-TRZ** in DCM solution.

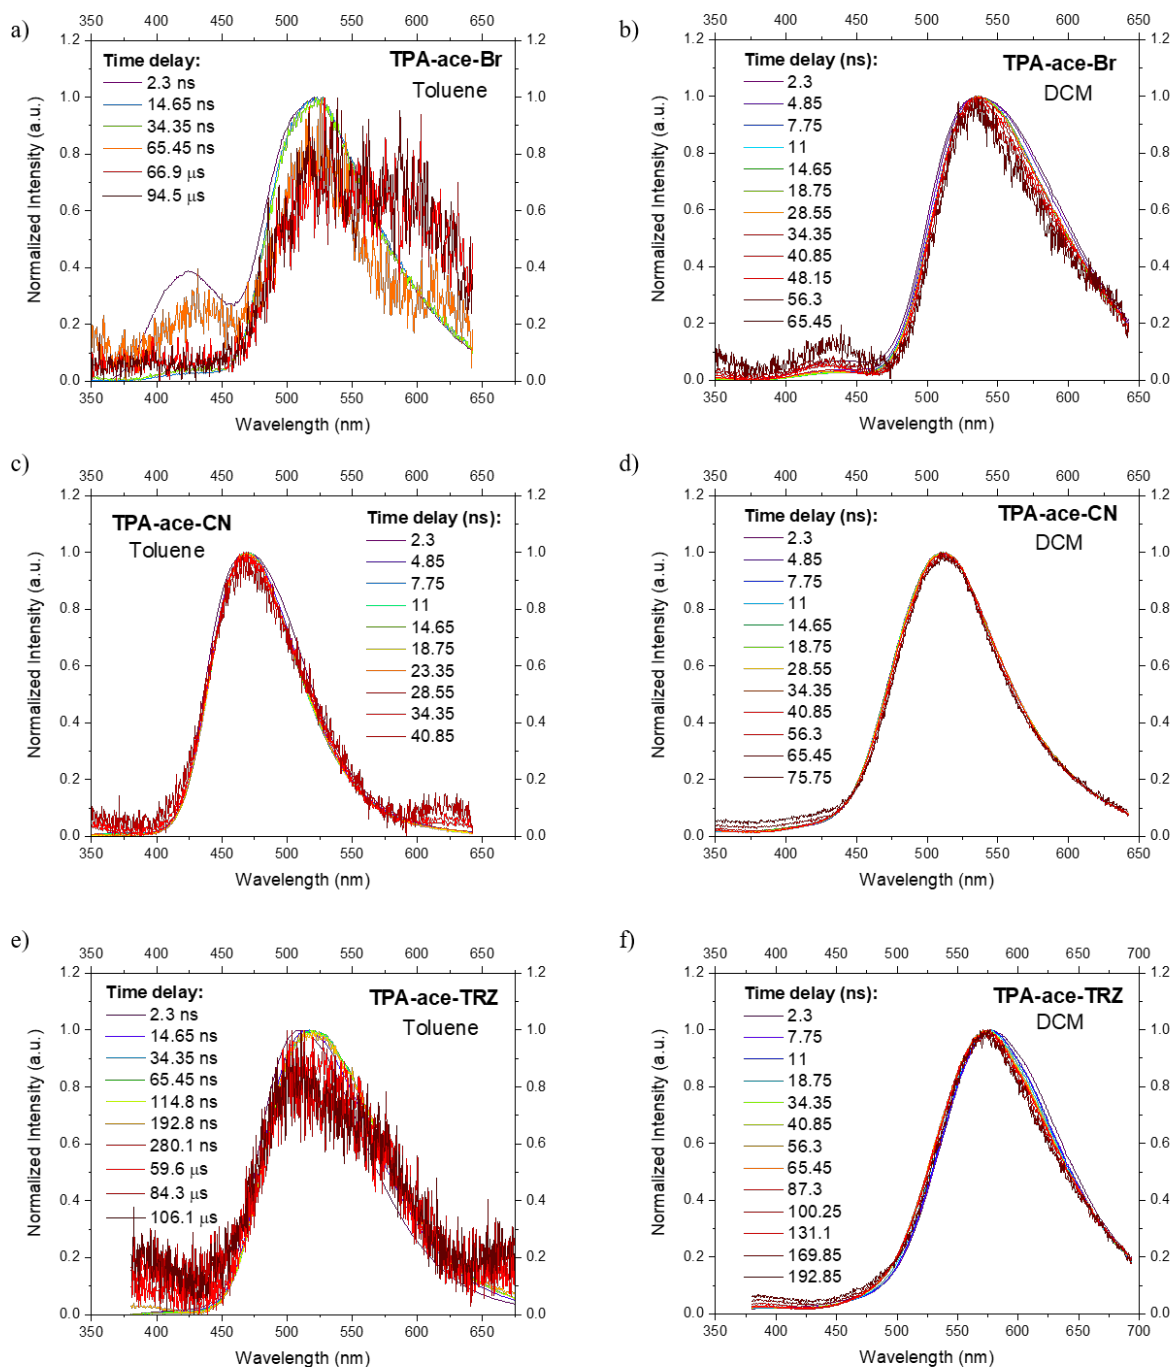

Figure S42. Comparison of the time resolved luminescence spectra decay of a) TPA-ace-Br in toluene b) TPA-ace-Br in DCM c) TPA-ace-CN in toluene d) TPA-ace-CN in DCM e) TPA-ace-TRZ in toluene and f) TPA-ace-TRZ in DCM solution.

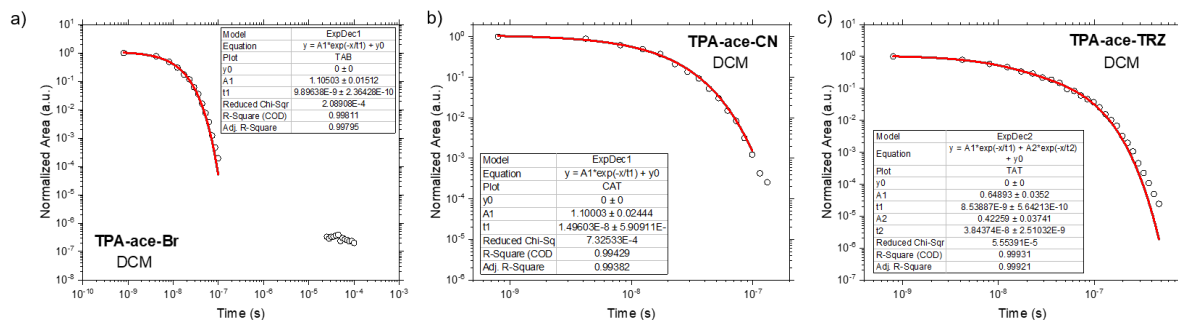

Figure S43. Fitted decay times from a) TPA-ace-Br, b) TPA-ace-CN and c) TPA-ace-TRZ dissolved in DCM, 20  $\mu$ M excited at 355 nm.

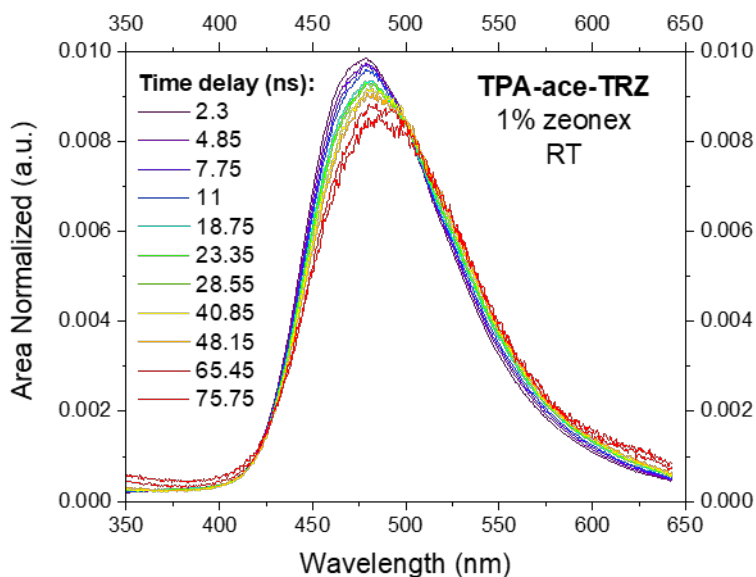

Figure S44. Area normalized emission spectra of TPA-ace-TRZ in 1% ZEONEX films at room temperature.

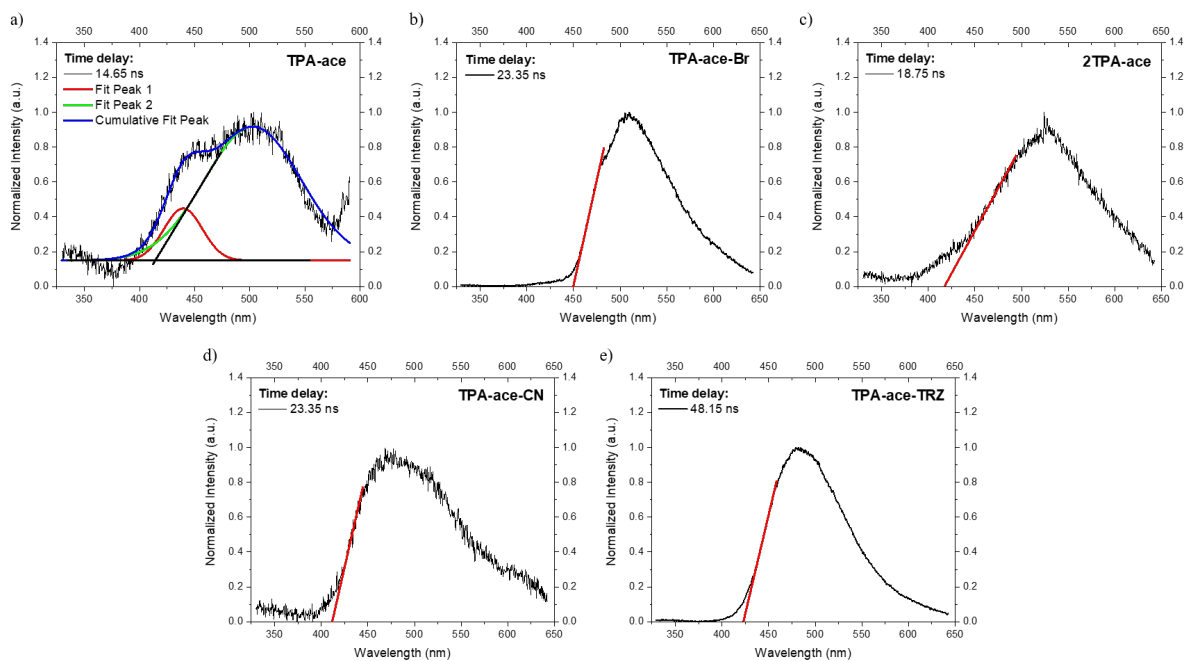

Figure S45. Onset of time resolved emission spectra for 1 wt% ZEONEX film of a) **TPA-ace**, which band was deconvoluted in order to obtain only  $^1\text{CT}$  onset, b) **TPA-ace-Br**, c) **2TPA-ace**, d) **TPA-ace-CN**, e) **TPA-ace-TRZ**, obtained after stabilization of  $^1\text{CT}$ .

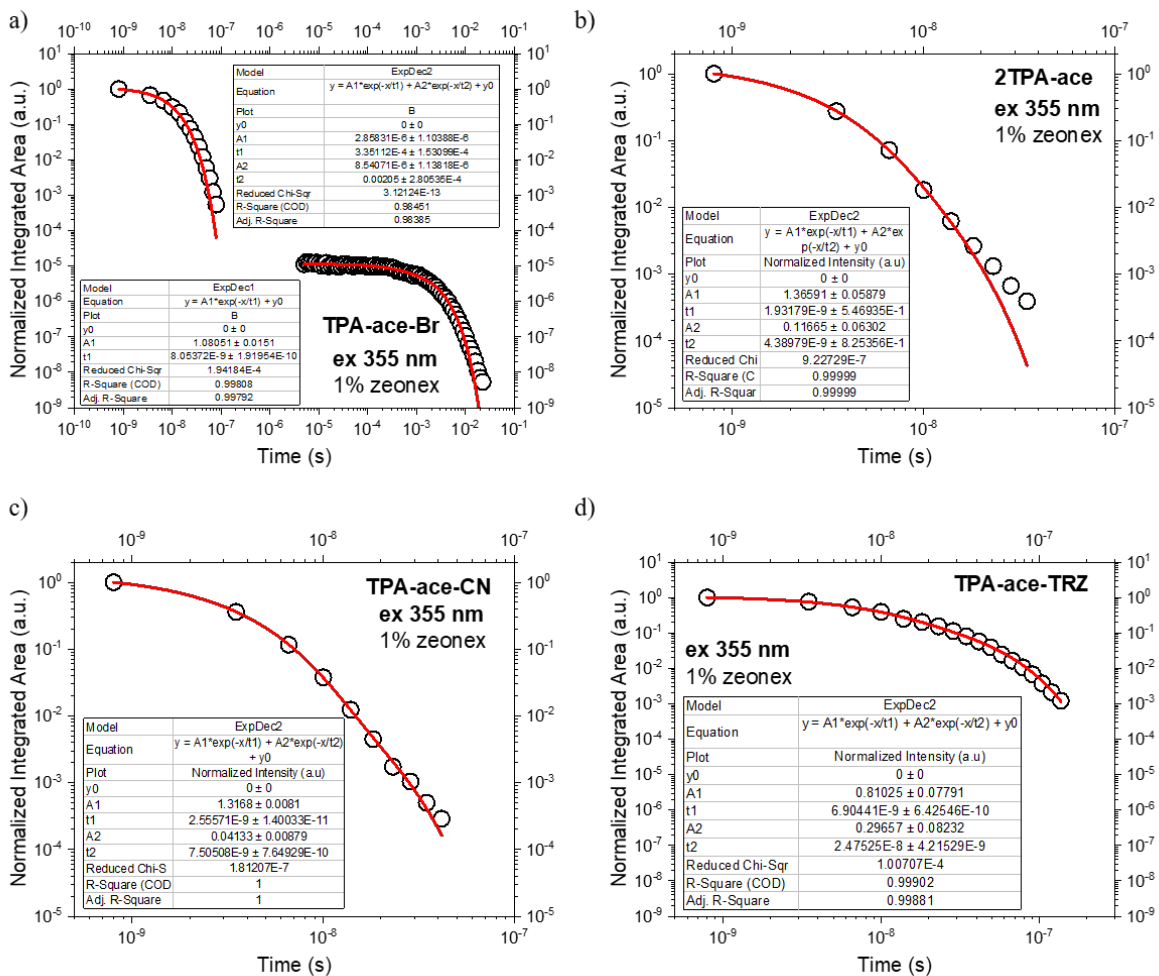

Figure S46. Fitting of kinetic decay results for a) TPA-ace-Br, b) 2TPA-ace, c) TPA-ace-CN and d) TPA-ace-TRZ in 1% ZEONEX film.

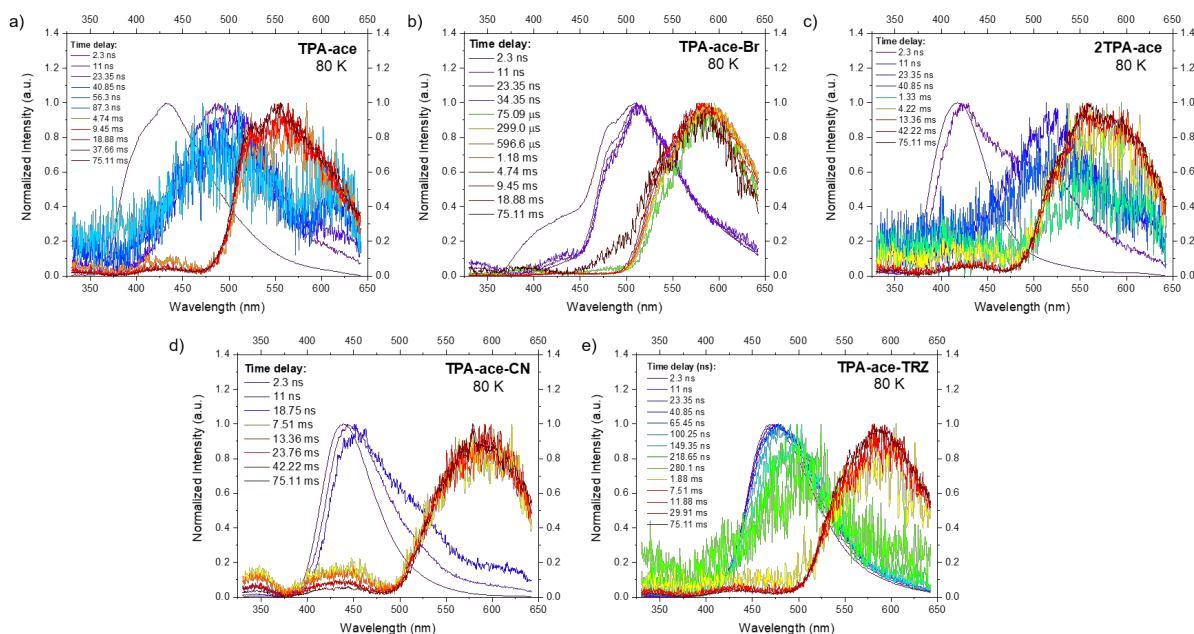

Figure S47. Time resolved normalized emission spectra of a) **TPA-ace**, b) **TPA-ace-Br**, c) **2TPA-ace**, d) **TPA-ace-CN** and e) **TPA-ace-TRZ** in 1% ZEONEX films. d) Time resolved fluorescence decay curves in the entire region of analyses. The curves were obtained with 355 nm excitation.

## References

- [1] Frisch, M. J.; Trucks, G. W.; Schlegel, H. B.; Scuseria, G. E.; Robb, M. A.; Cheeseman, J. R.; Scalmani, G.; Barone, V.; Petersson, G. A.; Nakatsuji, H.; Li, X.; Caricato, M.; Marenich, A. V.; Bloino, J.; Janesko, B. G.; Gomperts, R.; Mennucci, B.; Hratchian, H. P.; Ortiz, J. V.; Izmaylov, A. F.; Sonnenberg, J. L.; Williams, Ding, F.; Lipparini, F.; Egidi, F.; Goings, J.; Peng, B.; Petrone, A.; Henderson, T.; Ranasinghe, D.; Zakrzewski, V. G.; Gao, J.; Rega, N.; Zheng, G.; Liang, W.; Hada, M.; Ehara, M.; Toyota, K.; Fukuda, R.; Hasegawa, J.; Ishida, M.; Nakajima, T.; Honda, Y.; Kitao, O.; Nakai, H.; Vreven, T.; Throssell, K.; Montgomery Jr., J. A.; Peralta, J. E.; Ogliaro, F.; Bearpark, M. J.; Heyd, J. J.; Brothers, E. N.; Kudin, K. N.; Staroverov, V. N.; Keith, T. A.;



Kobayashi, R.; Normand, J.; Raghavachari, K.; Rendell, A. P.; Burant, J. C.; Iyengar, S. S.; Tomasi, J.; Cossi, M.; Millam, J. M.; Klene, M.; Adamo, C.; Cammi, R.; Ochterski, J. W.; Martin, R. L.; Morokuma, K.; Farkas, O.; Foresman, J. B.; Fox, D. J. *Gaussian 09 Rev. D.01*, Wallingford, CT, 2009.

[2] Adamo, C.; Barone, V., *J. Chem. Phys.* **1999**, *110*, 6158-6170.

[3] Hehre, W. J.; Ditchfield, R.; Pople, J. A., *J. Chem. Phys.* **1972**, *56*, 2257-2261.

[4] Hirata, S.; Head-Gordon, M., *Chem. Phys. Lett.* **1999**, *314*, 291-299.

[5] Cardona, C. M.; Li, W.; Kaifer, A. E.; Stockdale, D.; Bazan, G. C., *Adv. Mater.* **2011**, *23*, 2367-2371.

[6] Panchenko, P. A.; Arkhipova, A. N.; Zakharko, M. A.; Jonusauskas, G.; Fedorov, Y. V.; Fedorova, O. A., *Russ. Chem. Bull.* **2016**, *65*, 2444-2451.

[7] Nietfeld, J. P.; Schwiderski, R. L.; Gonnella, T. P.; Rasmussen, S. C., *J. Org. Chem.* **2011**, *76*, 6383-6388.

[8] *CrystalClear-SM Expert v2.1*; Rigaku Americas, The Woodlands, Texas, USA, and Rigaku Corporation, Tokyo, Japan, **2015**.

[9] *CrysAlisPro v1.171.38.46*; Rigaku Oxford Diffraction, Rigaku Corporation, Oxford, U.K. , **2015**.

[10] Burla, M. C.; Caliandro, R.; Camalli, M.; Carrozzini, B.; Cascarano, G. L.; De Caro, L.; Giacovazzo, C.; Polidori, G.; Spagna, R., *J. Appl. Crystallogr.* **2005**, *38*, 381-388.

[11] Sheldrick, G., *Acta Crystallogr. Sect. C* **2015**, *71*, 3-8.

[12] *CrystalStructure v4.3.0*; Rigaku Americas, The Woodlands, Texas, USA, and Rigaku Corporation, Tokyo, Japan, **2018**.
